# Supplementary material for: Optimal body fat percentage cut-off values for identifying cardiovascular risk factors in Mongolian and Han adults: a population-based cross-sectional study in Inner Mongolia, China
Source: PubMed Central journal article supplement — BMJ Open. 2017 Apr 17;7(4):e014675. doi: 10.1136/bmjopen-2016-014675 (PMC5719662; doi:10.1136/bmjopen-2016-014675), 2017-04-17
Supplement: bmjopen-2016-014675.draft_revisions.pdf [file bmjopen-2016-014675.draft_revisions.pdf]

# BMJ Open

## Optimal body fat percentage cut-off values for identifying cardiovascular risk factors in Mongolian and Han adults: A Population-based Cross-Sectional Study in Inner Mongolia, China

|                                 |                                                                                                                                                                                                                                                                                                           |
|---------------------------------|-----------------------------------------------------------------------------------------------------------------------------------------------------------------------------------------------------------------------------------------------------------------------------------------------------------|
| Journal:                        | <i>BMJ Open</i>                                                                                                                                                                                                                                                                                           |
| Manuscript ID                   | bmjopen-2016-014675                                                                                                                                                                                                                                                                                       |
| Article Type:                   | Research                                                                                                                                                                                                                                                                                                  |
| Date Submitted by the Author:   | 13-Oct-2016                                                                                                                                                                                                                                                                                               |
| Complete List of Authors:       | Li, Yanlong<br>Wang, Hailing<br>Wang, Ke<br>Wang, Wenrui<br>Dong, Fen<br>Qian, Yonggang<br>Gong, Haiying<br>Xu, Guodong<br>Li, Guoju<br>Pan, Li<br>Zhu, Guangjin<br>shan, guangliang; Department of Epidemiology and Statistics, Institute of Basic Medical Sciences, Chinese Academy of Medical Sciences |
| <b>Primary Subject Heading</b>: | Epidemiology                                                                                                                                                                                                                                                                                              |
| Secondary Subject Heading:      | Cardiovascular medicine                                                                                                                                                                                                                                                                                   |
| Keywords:                       | body composition, obesity, cardiovascular risk factors                                                                                                                                                                                                                                                    |
|                                 |                                                                                                                                                                                                                                                                                                           |

SCHOLARONE™  
Manuscripts

1  
2  
3  
4  
5 **Optimal body fat percentage cut-off values for identifying cardiovascular risk factors in Mongolian and Han adults: A Population-based**  
6 **Cross-Sectional Study in Inner Mongolia, China**  
7

8 Yanlong Li,<sup>1</sup> Hailing Wang,<sup>2</sup> Ke Wang,<sup>1</sup> Wenrui Wang,<sup>2</sup> Fen Dong,<sup>1</sup> Yonggang Qian,<sup>2</sup> Haiying Gong,<sup>1</sup> Guodong Xu,<sup>3</sup> Guoju Li,<sup>1</sup> Li Pan,<sup>1</sup>  
9 Guangjin Zhu,<sup>1</sup> Guangliang Shan,<sup>1</sup>  
10

11 <sup>1</sup>Department of Epidemiology and Statistics, Institute of Basic Medical Sciences, Chinese Academy of Medical Sciences, School of Basic  
12 Medicine, Peking Union Medical College, Beijing 100005, China  
13

14 <sup>2</sup>Inner Mongolia Center for Disease Control and Prevention, Hohhot, Inner Mongolia Autonomous Region 010110, China  
15

16 <sup>3</sup>Department of Epidemiology and Health Statistics, College of Public Health, Jilin University, Changchun 130021, China  
17

18 **Keywords:** body composition, obesity, cardiovascular risk factors  
19

20 **Running Title:** Optimal BF% cut-offs in Chinese  
21

22 **Corresponding Author:**  
23

24 Guangliang Shan  
25

26 Department of Epidemiology and Health Statistics, College of Public Health, Jilin University, Changchun 130021, China  
27

28 [Guangliang\\_shan@163.com](mailto:Guangliang_shan@163.com)  
29

30 **Word Count:** 2636 words  
31

32 **Tables:** 6  
33

34 **Figures:** 1  
35

36 **Supplementary Files:** 0  
37  
38  
39  
40  
41  
42

## Abstract

**Objective:** The present study was designed to determine the optimal cut-off values of BF% for obesity in Mongolian and Han adults.

**Method:** This cross-sectional study involving 3221 Chinese adults (2308 Han and 913 Mongolian) aged 20-80 years was conducted in Inner Mongolia Autonomous region, China, in 2014. Data from a standardized questionnaire, physical examination, and blood sample were obtained. The BF% was estimated using bioelectrical impedance analysis. Optimal BF% cut-offs were analyzed by receiver operating characteristic (ROC) curves to predict the risk of diabetes, hypertension, dyslipidemia. Binary logistic regression analysis was performed to evaluate the OR of each CVD risk factor according to obesity defined by BF%.

**Results:** Mean BF% levels were lower in men than in women ( 22.54±5.77 vs 32.95±6.18 in Han, 23.86±5.72 vs 33.98±6.40 in Mongolian, respectively;  $P<0.001$ ). In Han adults, the optimal BF% cut-off values to detect CVD risk factors varied from 18.7% to 24.2% in men, and 32.7% to 35.4% in women. In Mongolian population, the optimal cut-off values of BF% for men and women ranged from 21.0% to 24.6% and from 35.7% to 40.0%, respectively. Subjects with high BF% ( $\geq 24\%$  in men,  $\geq 34\%$  in women) had higher risk of CVD risk factors in Han (age-adjusted ORs from 1.479 to 3.680, 2.660 to 4.016, respectively). In Mongolian, adults with high BF% ( $\geq 25\%$  in men,  $\geq 35\%$  in women) had higher risk of CVD risk factors (age-adjusted ORs from 2.587 to 3.772, 2.061 to 4.882, respectively).

**Conclusions:** The optimal BF% cut-offs for obesity for the prediction of CVD risk factors in Chinese men and women were approximately 24% and 34% for Han adults, and 25% and 35% for Mongolian population, respectively.

### Strengths and limitations of this study

The present study was first designed to determine the optimal cut-off values of BF% for CVD risk factors (hypertension, diabetes, dyslipidemia) and clustering of  $\geq 2$  these risk factors in Chinese population.

This study used a large sample covering most age groups to estimate BF% cut-off values for discriminating CVD risk factors in both sexes, especially in different ethnics (Han and Mongolian) in China.

The prevention of public health problems was evaluated by PARP of BF% cut-offs in sexes and races.

The study characterizes the optimal body fat percentage cut-off values for identifying CVD risk factors in a cross-sectional setting using the occurrence of established CVD risk factors as a proxy risk estimate. Lots of epidemic studies, especially prospective cohort studies, need to be completed to improve cutoff points accuracy of BF% in China.

1  
2  
3  
4  
5 BF% in this study was measured using bioelectrical impedance analysis, which tends to underestimate body fat in all subjects and in men and  
6 women separately. However, considering the convenience and inexpensiveness of BIA, large-scale epidemiological investigations appropriately  
7 use this analysis.  
8

## 9 **Introduction**

10 During the past four decades, the global prevalence of underweight and obesity has risen dramatically and is now estimated to affect over 600  
11 million people[1]. In China, the prevalence of obesity approximately tripled from 3.75% in 1991 to 11.3% in 2011 according to diagnostic criteria  
12 of the Working Group on Obesity[2]. It is now identified that obesity essentially increases the risk of hypertension, diabetes and dyslipidemia,  
13 which has a great influence on the morbidity and mortality of Cardiovascular disease (CVD)[3].  
14

15  
16 Body mass index(BMI) closely correlated with body fatness is recommended by WHO as a population-level measure of overweight and obesity  
17 (BMI $\geq$ 30 or 25 kg/m<sup>2</sup> is defined as obese or overweight, respectively). However, it may not consistently characterize adiposity across racial/ethnic  
18 groups[4]. Body fat percentage (BF%) as a percentage of total bodyweight has advantages over BMI in estimating fat mass[5]. The BF% cut-off  
19 points for obesity proposed by the WHO are 25% for men and 35% for women, corresponding a BMI of 30 kg/m<sup>2</sup> in young Caucasians[6]. It was  
20 reported that BMI and percentage of body fat differ across populations[7]. The Chinese tend to have a lower BMI but a higher fat volume. Li and  
21 colleagues[8] showed that the BF% cut-off values for Chinese adults were similar to those proposed by the WHO. However, a longitudinal  
22 epidemiological study[9] reflected that the present Chinese BMI criteria(28 kg/m<sup>2</sup> for obesity) was relatively inconsistent with WHO BF% criteria  
23 in determining obesity. Therefore, the appropriate BF% cut-off points for Chinese remains inconclusive and needs to be further studied. Inner  
24 Mongolia Autonomous Region located in northern China consists mainly of Han and Mongolian. Compared with Han population, the dietary  
25 pattern of Mongolians tends to be traditionally rich in whole milk, fats and oils, which might increase greater risk of obesity in Mongolia [10]. In  
26 this study, we aimed to characterize the optimal BF% cut-off points in Mongolian and Han adults according to its risk for common CVD risk  
27 factors, including diabetes, hypertension and dyslipidemia.  
28  
29

## 30 **Methods**

### 31 **Study population**

32  
33 The present study was based on data from the China National Health Survey (CNHS) in Inner Mongolia Autonomous region in 2014, which has  
34 already been described in detail elsewhere[11]. A total of 3508 examinees aged 20-80 years were found to be eligible for the study. We excluded  
35 individuals with incomplete data for hypertension, diabetes and dyslipidemia status, sex, age and the anthropometric indices(i.e., BMI, BF%). In  
36 addition, pregnant women were excluded. This resulted in a final analytical sample of 3221 adults (2308 Han and 913 Mongolian).  
37  
38  
39  
40  
41  
42

Written informed consent was acquired from each participant before data collection. The study was approved by the Institutional Review Board of the Institute of Basic Medical Sciences, Chinese Academy of Medical Sciences.

### Data collection

A standardized health questionnaire was completed by investigators and contained demographic information, diseases (particularly hypertension, diabetes) and the family history of diabetes, cardiovascular disease, or cancer. Body height and weight of each subject dressed in light indoor clothing without shoes were determined. BMI was calculated as weight in kilograms divided by height in meters squared ( $\text{kg}/\text{m}^2$ ). Body fat percentage was measured by bioelectrical impedance analysis (BIA), with a commercially available body analyzer (BC-420, TANITA, Japan), in subjects who wore light clothes and were barefoot. Blood pressure was taken three times using the electronic sphygmomanometer (HEM-907, OMRON, Japan) and the average was used as the mean blood pressure. All surveys were performed by trained staff.

Blood samples were collected from all participants following an overnight fast. Serum total cholesterol (TC), triglycerides (TG), low-density lipoprotein-cholesterol (LDL-C), high-density lipoprotein-cholesterol (HDL-C), and fasting plasma glucose (FPG) were determined by Peking Union Medical College Hospital.

### Definition of CVD risk factors

Diabetes was defined as FPG  $\geq 7.0$  mmol/L and/or physician-diagnosed diabetes. Hypertension was defined as mean systolic blood pressure (SBP)  $\geq 140$  mmHg and/or mean diastolic blood pressure (DBP)  $\geq 90$  mmHg and/or physician-diagnosed hypertension. Dyslipidemia was defined as follow: TC  $\geq 6.22$  mmol/L and/or LDL-C  $\geq 4.14$  mmol/L and/or HDL-C  $< 1.04$  mmol/L and/or TG  $\geq 2.26$  mmol/L. Clustering of risk factors was defined as presence of  $\geq 2$  CVD risk factors.

### Statistical analysis

Statistical analysis was performed using SAS software (version 9.3; SAS Institute, Cary, NC, USA). Continuous variables were presented as mean  $\pm$ SD; comparisons between two groups were used by Student's t test. Categorical variables were expressed as percentages and compared by Chi-square test. Two-tailed *P*-value less than 0.05 was considered statistically significant.

Receive operating characteristic (ROC) curve analysis was performed to using BF% as continuous variable in logistic regression models to obtain accurate estimates of area under the curve (AUC) in relation to hypertension, diabetes, and dyslipidemia, which describe the probability that a test will correctly identify subjects with disease. The optimal cut-off values were defined as the points on the ROC curve where Youden's index (sensitivity+specificity-1) was the maximal. Odd ratios (ORs) and the corresponding 95% confidence interval (CI) were calculated by binary logistic regression analysis to measure the association between obesity defined by BF% and CVD risk factors. PARP (percent of prevalence of a

1  
2  
3  
4  
5  
6  
7  
8  
9  
10  
11  
12  
13  
14  
15  
16  
17  
18  
19  
20  
21  
22  
23  
24  
25  
26  
27  
28  
29  
30  
31  
32  
33  
34  
35  
36  
37  
38  
39  
40  
41  
42  
43  
44  
45  
46  
47  
48  
49

condition/disease in the population due to presence of risk factor or percent of prevalence of a condition/disease in the population that would be reduced if risk factor was removed) for each CVD risk factor was calculated by sex-specific cut-offs for BF%. Formulas for calculation of PARP are given below.

$$PARP(\%) = 100 * P (OR-1) / [ P (OR-1)+1 ]\%$$

(P: percent of subjects whose BF% was above the sex-specific cut-off value; OR: age-adjusted odds ratios for cardiovascular risk factors in subjects using sex-specific cut-offs for BF%)

**Results**

**Base characteristics of subjects**

Baseline characteristics for men and women in Han and Mongolian adults are shown in Table 1. In Han adults, men had a higher mean BMI, SBP, DBP, FG, TC, TG, meanwhile a lower BF% and HDL-C than women. LDL-C were comparable between men and women (P>0.05). The prevalence of hypertension, diabetes, and dyslipidemia were higher in men than in women. Similarly in Mongolian adults, men had a higher mean BMI, SBP, DBP, FG, TC, TG, LDL-C whereas a lower BF% and HDL-C than women. The prevalence of CVD risk factors were higher in men than in women.

**Table 1** Baseline Characteristics by sex in Han and Mongolian adults

| Variables     | Han(n=2308)     |               |              | Mongolian(n=913) |              |              |
|---------------|-----------------|---------------|--------------|------------------|--------------|--------------|
|               | Men(n=898)      | Women(n=1410) | All cases    | Men(n=355)       | Women(n=558) | All cases    |
| Age(years)    | 46.20±14.05***  | 44.24±13.29   | 45.00±13.62  | 45.91±13.69**    | 43.34±13.03  | 44.34±13.34  |
| Height(cm)    | 170.12±5.94***  | 158.28±5.51   | 162.89±8.10  | 170.54±6.35***   | 158.53±5.46  | 163.21±8.26  |
| Weight(kg)    | 72.92±12.18***  | 60.20±9.70    | 65.15±12.39  | 75.11±12.96***   | 61.54±10.08  | 66.82±13.08  |
| BMI(kg/m2)    | 25.17±3.82***   | 24.04±3.72    | 24.48±3.80   | 25.78±3.96***    | 24.52±4.07   | 25.01±4.07   |
| BF(%)         | 22.54±5.77***   | 32.95±6.18    | 28.90±7.88   | 23.86±5.72***    | 33.98±6.40   | 30.05±7.88   |
| SBP(mmHg)     | 127.40±14.96*** | 119.07±17.14  | 122.31±16.82 | 129.4±16.05***   | 118.22±17.65 | 122.57±17.89 |
| DBP(mmHg)     | 80.21±10.52***  | 75.42±10.66   | 77.28±10.86  | 82.2±11.89***    | 75.67±11.96  | 78.21±12.34  |
| FPG(mmol/L)   | 5.53±1.49***    | 5.22±1.08     | 5.34±1.27    | 5.56±1.48***     | 5.14±1.09    | 5.30±1.27    |
| TC(mmol/L)    | 4.86±1.00*      | 4.76±1.04     | 4.80±1.03    | 5.10±0.97***     | 4.89±1.03    | 4.98±1.02    |
| TG(mmol/L)    | 2.18±1.89***    | 1.55±1.13     | 1.80±1.50    | 2.00±1.46***     | 1.46±1.18    | 1.67±1.32    |
| LDL-C(mmol/L) | 2.86±0.86       | 2.83±0.85     | 2.84±0.86    | 3.13±0.87***     | 2.93±0.86    | 3.01±0.87    |

|                    |              |           |           |              |           |           |
|--------------------|--------------|-----------|-----------|--------------|-----------|-----------|
| HDL-C(mmol/L)      | 1.19±0.32*** | 1.39±0.34 | 1.31±0.34 | 1.27±0.34*** | 1.45±0.37 | 1.38±0.37 |
| Hypertension(%)    | 33.74***     | 23.48     | 27.47     | 40.28***     | 25.63     | 31.33     |
| Diabetes(%)        | 9.58***      | 5.53      | 7.11      | 9.86***      | 3.23      | 5.81      |
| Dyslipidemia(%)    | 51.11***     | 27.73     | 36.83     | 47.32***     | 26.34     | 34.5      |
| Risk factors ≥2(%) | 24.16***     | 12.2      | 16.85     | 27.32***     | 13.8      | 19.06     |

Values are means±SD or %.

\* $P<0.05$ , \*\* $P<0.01$ , \*\*\* $P<0.001$  compared with women within Han or Mongolian adults(Student's t-tests for continuous variables; Chi-square tests for categorical variables).

BF(%), body fat percentage; SBP, systolic blood pressure; DBP, diastolic blood pressure; FPG, fasting plasma glucose;

TC, total cholesterol; TG, triglycerides; LDL-C, low-density lipoprotein-cholesterol; HDL-C, high-density lipoprotein-cholesterol.

#### Area under ROC and optimal cut-offs for predicting CVD risk factors

Figure 1 shows ROC curves of BF% for identifying CVD risk factors in men and women among Han and Mongolian adults. Area under ROC curves of BF% stratified by age groups are summarized in Table 2. In Han population, the AUC of BF% ranged from 0.589 to 0.699 for men and from 0.711 to 0.763 for women. Compared with men, AUCs for diabetes and clustering of  $\geq 2$  risk factors in women were significantly higher( $P<0.05$ ). In addition, the AUC for CVD risk factors were larger in the younger age group than that in the older in women ( $P<0.05$ ). However, AUCs for cardiovascular risk factors were all comparable between men and women in Mongolian adults ( $P>0.05$ ). Among these, the AUCs of BF% ranged from 0.686 to 0.736 for men and from 0.685 to 0.783 for women. Although BF% performed differently for CVD risk factors in age groups of both sexes, there were no significant difference in the AUCs ( $P>0.05$ ).

**Figure 1** ROC curves for BF% screening CVD risk factors.

**Table 2** Area under receiver operating characteristic (ROC) curves of BF% screening CVD risk factors

|             | Hypertension       | Diabetes           | Dyslipidemia       | Risk factors $\geq 2$ |
|-------------|--------------------|--------------------|--------------------|-----------------------|
| <b>Han</b>  |                    |                    |                    |                       |
| Men         |                    |                    |                    |                       |
| All ages    | 0.696(0.661,0.732) | 0.589(0.531,0.648) | 0.682(0.647,0.717) | 0.699(0.662,0.736)    |
| 20-49 years | 0.734(0.686,0.782) | 0.532(0.417,0.646) | 0.700(0.655,0.745) | 0.731(0.681,0.780)    |
| 50-80       | 0.666(0.611,0.720) | 0.606(0.536,0.676) | 0.661(0.607,0.716) | 0.670(0.613,0.726)    |

|    |                  |                     |                     |                     |                     |
|----|------------------|---------------------|---------------------|---------------------|---------------------|
| 1  |                  |                     |                     |                     |                     |
| 2  |                  |                     |                     |                     |                     |
| 3  |                  |                     |                     |                     |                     |
| 4  |                  |                     |                     |                     |                     |
| 5  | years            |                     |                     |                     |                     |
| 6  | Women            |                     |                     |                     |                     |
| 7  | All ages         | 0.737(0.707,0.767)  | 0.728(0.676,0.780)* | 0.711(0.683,0.740)  | 0.763(0.729,0.797)* |
| 8  | 20-49            |                     |                     |                     |                     |
| 9  | years            | 0.761(0.718,0.805)  | 0.787(0.700,0.874)  | 0.735(0.698,0.773)  | 0.836(0.788,0.885)  |
| 10 | 50-80            |                     |                     |                     |                     |
| 11 | years            | 0.645(0.595,0.695)# | 0.617(0.544,0.689)# | 0.596(0.545,0.646)# | 0.644(0.590,0.698)# |
| 12 |                  |                     |                     |                     |                     |
| 13 | <b>Mongolian</b> |                     |                     |                     |                     |
| 14 | Men              |                     |                     |                     |                     |
| 15 | All ages         | 0.702(0.648,0.757)  | 0.686(0.609,0.764)  | 0.690(0.636,0.745)  | 0.736(0.683,0.789)  |
| 16 | 20-49            |                     |                     |                     |                     |
| 17 | years            | 0.714(0.636,0.793)  | 0.765(0.646,0.884)  | 0.681(0.608,0.753)  | 0.764(0.688,0.839)  |
| 18 | 50-80            |                     |                     |                     |                     |
| 19 | years            | 0.665(0.577,0.754)  | 0.609(0.498,0.720)  | 0.689(0.604,0.775)  | 0.689(0.606,0.772)  |
| 20 |                  |                     |                     |                     |                     |
| 21 | Women            |                     |                     |                     |                     |
| 22 | All ages         | 0.733(0.685,0.780)  | 0.733(0.601,0.865)  | 0.685(0.637,0.733)  | 0.783(0.730,0.835)  |
| 23 | 20-49            |                     |                     |                     |                     |
| 24 | years            | 0.643(0.557,0.729)  | 0.729(0.616,0.842)  | 0.670(0.604,0.735)  | 0.764(0.666,0.863)  |
| 25 | 50-80            |                     |                     |                     |                     |
| 26 | years            | 0.683(0.604,0.763)  | 0.664(0.481,0.848)  | 0.586(0.502,0.671)  | 0.690(0.607,0.773)  |
| 27 |                  |                     |                     |                     |                     |

\* $P < 0.05$ , Compared to men.

# $P < 0.05$ , Compared to 20-49 years.

Optimal cut-off points of BF% for CVD risk factors in both ethnic groups were given in Table 3, which were identified according to the highest Youden's index on ROC curves. In Han adults, the BF% cut-off values were found to optimally predict the risk of hypertension, diabetes and dyslipidemia varied from 18.7% to 24.2% in men, and 32.7% to 35.4% in women. In addition, the optimal cut-off points of BF% were all higher for women than for men in each CVD risk factor. In Mongolian, the optimal BF% cut-off values for men and women ranged from 21.0% to 24.6% and from 35.7% to 40.0%, respectively. The optimal BF% cut-offs between men and women in Mongolian adults were significantly different. Basically, the optimal cut-off values of BF% in women were mostly higher for older age group than for the younger in Han and Mongolian adults. However, the optimal BF% cut-off points varied greatly by age and CVD risk factors.



**Table 3** Optimal cut-off values of BF% and their sensitivities, specificities, and Youden's index for CVD risk factors by age groups and sex

|                  | Hypertension |      |      |      | Diabetes |       |      |      | Dyslipidemia |      |      |      | Risk factors $\geq$ 2 |      |      |      |
|------------------|--------------|------|------|------|----------|-------|------|------|--------------|------|------|------|-----------------------|------|------|------|
|                  | Cutoff       | Sen  | Spe  | YI   | Cutoff   | Sen   | Spe  | YI   | Cutoff       | Sen  | Spe  | YI   | Cutoff                | Sen  | Spe  | YI   |
| <b>Han</b>       |              |      |      |      |          |       |      |      |              |      |      |      |                       |      |      |      |
| Men              |              |      |      |      |          |       |      |      |              |      |      |      |                       |      |      |      |
| All ages         | 24.2         | 62.7 | 70.3 | 33.0 | 18.7     | 94.2  | 23.5 | 17.7 | 21.6         | 77.3 | 52.4 | 29.7 | 24.2                  | 64.5 | 66.7 | 31.2 |
| 20-49 years      | 24.2         | 69.3 | 71.1 | 40.4 | 18.8     | 92.3  | 24.6 | 17.0 | 21.6         | 75.8 | 56.0 | 31.9 | 24.2                  | 68.4 | 67.8 | 36.3 |
| 50-80 years      | 24.2         | 58.0 | 68.7 | 26.6 | 22.5     | 75.0  | 45.1 | 20.1 | 20.5         | 87.1 | 41.9 | 29.0 | 25.0                  | 54.9 | 71.8 | 26.7 |
| Women            |              |      |      |      |          |       |      |      |              |      |      |      |                       |      |      |      |
| All ages         | 34.2         | 71.9 | 64.8 | 36.7 | 35.4     | 69.2  | 67.5 | 36.7 | 32.7         | 77.2 | 55.8 | 33.1 | 33.7                  | 83.1 | 58.1 | 41.2 |
| 20-49 years      | 33.6         | 73.7 | 67.2 | 40.9 | 32.0     | 94.4  | 52.6 | 47.1 | 33.9         | 66.1 | 70.3 | 36.5 | 33.9                  | 90.5 | 65.6 | 56.1 |
| 50-80 years      | 36.8         | 52.6 | 70.7 | 23.2 | 35.4     | 70.0  | 51.2 | 21.2 | 34.8         | 66.8 | 50.6 | 17.4 | 36.7                  | 56.9 | 65.5 | 22.4 |
| <b>Mongolian</b> |              |      |      |      |          |       |      |      |              |      |      |      |                       |      |      |      |
| Men              |              |      |      |      |          |       |      |      |              |      |      |      |                       |      |      |      |
| All ages         | 23.0         | 84.6 | 48.1 | 32.7 | 21.9     | 97.1  | 33.4 | 30.6 | 21.0         | 89.3 | 41.7 | 31.0 | 24.6                  | 77.3 | 60.1 | 37.4 |
| 20-49 years      | 23.0         | 87.3 | 51.3 | 38.6 | 26.8     | 75.0  | 75.1 | 50.1 | 18.5         | 94.5 | 35.1 | 29.6 | 25.7                  | 72.2 | 71.6 | 43.8 |
| 50-80 years      | 21.9         | 88.6 | 40.3 | 29.0 | 22.0     | 95.7  | 28.3 | 24.0 | 21.0         | 94.8 | 38.4 | 33.2 | 21.9                  | 96.7 | 37.1 | 33.8 |
| Women            |              |      |      |      |          |       |      |      |              |      |      |      |                       |      |      |      |
| All ages         | 35.7         | 71.3 | 66.3 | 37.6 | 40.0     | 55.6  | 84.6 | 40.2 | 36.4         | 62.6 | 68.6 | 31.2 | 36.4                  | 80.5 | 66.9 | 47.5 |
| 20-49 years      | 35.7         | 55.6 | 70.7 | 26.3 | 34.8     | 100.0 | 61.8 | 61.8 | 31.1         | 82.9 | 43.5 | 26.3 | 36.4                  | 70.0 | 74.1 | 44.1 |
| 50-80 years      | 36.7         | 73.5 | 54.5 | 28.0 | 41.0     | 60.0  | 81.3 | 41.3 | 36.5         | 77.9 | 46.9 | 24.9 | 36.6                  | 84.2 | 46.6 | 30.8 |

Sen, sensitivity; Spe, specificity; YI, Youden's index.

The optimal cut-offs of BF% for identifying CVD risk factors in Han and Mongolian adults were also assessed. Table 4 and Table 5 show the sensitivity, specificity and Youden's index for the various cut-off values for BF% in men and women. Clearly, specificity gradually increased but sensitivity conversely decreased with the increase cut-off values of BF% in men and women. BF% cut-off points of preferable sensitivity and specificity to detect each CVD risk factor and clustering of  $\geq$ 2 risk factors were selected as optimal values. In Han population, 24% and 34 % were the optimal BF% cut-off values in terms of the Youden's index, sensitivity and specificity for men and women, respectively. In Mongolian, the optimal cut-off points of BF% were 25% for men and 35% for women.

**Table 4.** Sensitivity, specificity and Youden's index for BF% to detect CVD risk factors by sex-specific cut-offs in Han adults

|           | Hypertension |             |             | Diabetes    |             |             | Dyslipidemia |             |             | Risk factors $\geq 2$ |             |             |
|-----------|--------------|-------------|-------------|-------------|-------------|-------------|--------------|-------------|-------------|-----------------------|-------------|-------------|
|           | Sen          | Spe         | YI          | Sen         | Spe         | YI          | Sen          | Spe         | YI          | Sen                   | Spe         | YI          |
| Men       |              |             |             |             |             |             |              |             |             |                       |             |             |
| 21        | 83.8         | 41.3        | 25.2        | 79.1        | 34.1        | 13.2        | 81.1         | 47.4        | 28.4        | 88.0                  | 39.5        | 27.5        |
| 22        | 77.6         | 49.4        | 27.0        | 70.9        | 41.5        | 12.4        | 73.4         | 54.7        | 28.1        | 81.1                  | 47.1        | 28.3        |
| 23        | 69.6         | 59.2        | 28.8        | 61.6        | 50.6        | 12.3        | 63.8         | 63.3        | 27.2        | 72.4                  | 56.4        | 28.7        |
| <b>24</b> | <b>64.0</b>  | <b>67.1</b> | <b>31.1</b> | <b>53.5</b> | <b>57.6</b> | <b>11.1</b> | <b>56.0</b>  | <b>69.7</b> | <b>25.7</b> | <b>66.4</b>           | <b>63.9</b> | <b>30.2</b> |
| 25        | 52.5         | 74.5        | 26.9        | 44.2        | 66.4        | 10.6        | 45.3         | 76.5        | 21.9        | 55.8                  | 72.1        | 27.9        |
| 26        | 43.9         | 81.3        | 25.2        | 33.7        | 73.5        | 7.2         | 51.1         | 81.3        | 32.4        | 44.7                  | 78.4        | 23.1        |
| Women     |              |             |             |             |             |             |              |             |             |                       |             |             |
| 32        | 84.0         | 50.5        | 34.5        | 89.7        | 44.3        | 34.0        | 80.3         | 51.1        | 31.4        | 91.3                  | 47.1        | 38.4        |
| 33        | 78.6         | 56.9        | 35.5        | 82.1        | 50.4        | 32.4        | 74.7         | 57.5        | 32.2        | 85.5                  | 53.3        | 38.8        |
| <b>34</b> | <b>72.2</b>  | <b>63.2</b> | <b>35.4</b> | <b>75.6</b> | <b>56.7</b> | <b>32.3</b> | <b>68.3</b>  | <b>63.8</b> | <b>32.1</b> | <b>79.7</b>           | <b>59.7</b> | <b>39.3</b> |
| 35        | 64.4         | 70.9        | 35.3        | 70.5        | 64.6        | 35.1        | 58.6         | 70.8        | 29.3        | 69.8                  | 67.1        | 36.9        |
| 36        | 55.6         | 77.3        | 32.9        | 62.8        | 71.5        | 34.3        | 48.3         | 76.5        | 24.8        | 61.1                  | 73.8        | 34.9        |
| 37        | 47.7         | 82.7        | 30.4        | 53.9        | 77.3        | 31.1        | 38.9         | 81.1        | 19.9        | 52.3                  | 79.4        | 31.7        |

Sen, sensitivity; Spe, specificity; YI, Youden's index.

**Table 5.** Sensitivity, specificity and Youden's index for BF% to detect CVD risk factors by sex-specific cut-offs in Mongolian adults

|     | Hypertension |      |      | Diabetes |      |      | Dyslipidemia |      |      | Risk factors $\geq 2$ |      |      |
|-----|--------------|------|------|----------|------|------|--------------|------|------|-----------------------|------|------|
|     | Sen          | Spe  | YI   | Sen      | Spe  | YI   | Sen          | Spe  | YI   | Sen                   | Spe  | YI   |
| Men |              |      |      |          |      |      |              |      |      |                       |      |      |
| 21  | 88.1         | 37.3 | 25.4 | 97.1     | 29.7 | 26.8 | 89.3         | 41.7 | 31.0 | 95.9                  | 35.7 | 31.5 |
| 22  | 86.7         | 43.4 | 30.1 | 94.3     | 34.1 | 28.4 | 82.7         | 43.9 | 26.6 | 93.8                  | 40.7 | 34.5 |
| 23  | 84.6         | 48.1 | 32.7 | 88.6     | 37.5 | 26.1 | 81.0         | 49.2 | 30.2 | 91.8                  | 45.0 | 36.7 |
| 24  | 72.7         | 54.7 | 27.5 | 82.9     | 46.6 | 29.4 | 69.1         | 55.1 | 24.1 | 79.4                  | 52.3 | 31.7 |

|       |           |             |             |             |             |             |             |             |             |             |             |             |             |
|-------|-----------|-------------|-------------|-------------|-------------|-------------|-------------|-------------|-------------|-------------|-------------|-------------|-------------|
|       | <b>25</b> | <b>60.8</b> | <b>64.2</b> | <b>25.0</b> | <b>71.4</b> | <b>56.9</b> | <b>28.3</b> | <b>60.1</b> | <b>66.8</b> | <b>27.0</b> | <b>70.1</b> | <b>63.2</b> | <b>33.3</b> |
|       | 26        | 53.2        | 72.2        | 25.3        | 60.0        | 64.4        | 24.4        | 49.4        | 72.2        | 21.6        | 60.8        | 70.5        | 31.4        |
| Women |           |             |             |             |             |             |             |             |             |             |             |             |             |
|       | 32        | 84.6        | 42.9        | 27.5        | 83.3        | 36.5        | 19.8        | 81.6        | 42.1        | 23.7        | 92.2        | 40.3        | 32.5        |
|       | 33        | 79.7        | 48.9        | 28.6        | 83.3        | 42.4        | 25.7        | 76.9        | 48.2        | 25.1        | 88.3        | 46.4        | 34.7        |
|       | 34        | 75.5        | 54.7        | 30.2        | 83.3        | 48.0        | 31.3        | 73.5        | 54.3        | 27.7        | 85.7        | 52.2        | 37.9        |
|       | <b>35</b> | <b>73.4</b> | <b>62.2</b> | <b>35.6</b> | <b>77.8</b> | <b>54.1</b> | <b>31.9</b> | <b>68.7</b> | <b>60.8</b> | <b>29.5</b> | <b>84.4</b> | <b>59.0</b> | <b>43.5</b> |
|       | 36        | 68.5        | 67.0        | 35.5        | 66.7        | 58.7        | 25.4        | 63.3        | 65.5        | 28.7        | 80.5        | 64.0        | 44.6        |
|       | 37        | 58.7        | 73.5        | 32.2        | 61.1        | 66.1        | 27.2        | 55.1        | 72.5        | 27.6        | 70.1        | 70.9        | 41.0        |

Sen, sensitivity; Spe, specificity; YI, Youden's index.

The age-adjusted OR(95%CI) and PARP of each CVD risk factor using sex-specific cut-offs for BF% in Han and Mongolian adults are shown in Table 6. In Han adults, BF% corresponded to significantly higher OR for hypertension and dyslipidemia in men except diabetes, while BF% corresponded to significantly higher OR for all CVD risk factors in women. In Mongolian population, BF% corresponded to significantly higher OR for all CVD risk factors in both sexes except diabetes in women. According to PARP analysis, the proportion of Han adults whose BF%  $\geq 24\%$  was about 43% in men. If BF% were controlled below 24%, 53.8% of hypertension, 17.2% of diabetes, 46.1% of dyslipidemia, and 51.6% of clustering of  $\geq 2$  CVD risk factors would be prevented. Women whose BF%  $\geq 34\%$  was about 45% in Han women. If BF% were controlled under 24%, 57.6% of clustering of  $\geq 2$  risk factors would be prevented. In Mongolian, the proportions of subjects whose BF% above 25% for men and 35% for women were round 46% and 47%, respectively. If BF% were controlled under 25% for men and 35% for women, 56%-65% of clustering of  $\geq 2$  risk factors would be prevented.

**Table 6.** Age-adjusted OR(95%CI) and PARP of each CVD risk factor by sex-specific cut-offs for BF% in Han and Mongolian adults

|                       | <i>OR*</i> | <i>95%CI</i> | <i>PARP(%)</i> |
|-----------------------|------------|--------------|----------------|
| <b>Han</b>            |            |              |                |
| Men(BF% $\geq 24\%$ ) |            |              |                |
| Hypertension          | 3.680      | 2.728-4.964  | 53.8           |
| Diabetes              | 1.479      | 0.940-2.328  | 17.2           |
| Dyslipidemia          | 2.966      | 2.251-3.908  | 46.1           |
| Risk factors $\geq 2$ | 3.450      | 2.490-4.780  | 51.6           |

|                       |       |             |      |
|-----------------------|-------|-------------|------|
| Women(BF% $\geq$ 34%) |       |             |      |
| Hypertension          | 3.382 | 2.544-4.494 | 51.8 |
| Diabetes              | 2.660 | 1.539-4.596 | 42.8 |
| Dyslipidemia          | 3.152 | 2.439-4.072 | 49.3 |
| Risk factors $\geq$ 2 | 4.016 | 2.682-6.014 | 57.6 |
| <b>Mongolian</b>      |       |             |      |
| Men(BF% $\geq$ 25%)   |       |             |      |
| Hypertension          | 2.587 | 1.635-4.094 | 42.2 |
| Diabetes              | 2.982 | 1.374-6.471 | 47.6 |
| Dyslipidemia          | 2.986 | 1.930-4.620 | 47.7 |
| Risk factors $\geq$ 2 | 3.772 | 2.251-6.321 | 56.0 |
| Women(BF% $\geq$ 35%) |       |             |      |
| Hypertension          | 2.851 | 1.796-4.526 | 46.5 |
| Diabetes              | 2.061 | 0.634-6.697 | 33.3 |
| Dyslipidemia          | 2.599 | 1.704-3.964 | 42.9 |
| Risk factors $\geq$ 2 | 4.882 | 2.497-9.545 | 64.6 |

\*Adjusted odds ratios for cardiovascular risk factors in subjects using sex-specific cut-offs for BF%, adjusted for age.

OR, odds ratios; PARP, population attributable risk proportion.

## Discussion

The present study, using data obtained from Han and Mongolian adults from Inner Mongolia, China showed that BF% performed differently for discriminating CVD risk factors in sex and ethnicity. The optimal BF% cut-off points for men and women were approximately 24.0% and 34.0% in Han adults, and 25.0% and 35.0% in Mongolian population, respectively. Compared with WHO criteria, the optimal BF% cut-offs in this study were relatively lower in Han adults, but similar in Mongolian, which were taken account of validity to detect CVD risk factors and clustering two or more CVD risk factors.

BMI is the most widely used measure to diagnose obesity. However, the accuracy of BMI in detecting excess body adiposity in the general adult population is limited, because BMI cannot measure BF% directly and poorly distinguishes among total body fat, total body lean, and bone mass[12, 13]. To overcome misclassifications, direct measurements of BF% would be a better tool for diagnosing obesity. Moreover, BF% has

1  
2  
3  
4  
5 been found to have a stronger association with multiple CVD risk factors in several studies conducted in China[8], Korea[14], and other ethnic  
6 groups[15-17]. Our data also support the good discrimination of BF% for each CVD risk factor and clustering of  $\geq 2$  risk factors in both sexes and  
7 ethnicities. However, BF% seems performed better in women than in men to detect CVD risk factors, which might result from greater less mass  
8 and lower fat mass men had than women[18]. Besides, BF% had larger AUCs for almost CVD risk factors in women aged  $< 50$  years than in the  
9 older women, but not obviously in men. In a Korean study, women after menopause had not only higher total body fat percentage but also its  
10 different distribution, which independently correlates with cardiovascular disease risk factors[19]. In addition, a study of 402 women aged 30-75  
11 years in Southern India also shown that menopausal status and associated obesity created a compatible atmosphere for abnormal metabolism and  
12 aggravated cardio metabolic risk factors[20]. However, the relationship between obesity in women after menopause and CVD risk factors is more  
13 vulnerable to the effect of confounding variables, such as ageing, which might affect the accuracy of prediction of BF% for CVD risk factors.  
14  
15

16 It has been demonstrated that adipose tissue distribution varies among different ethnicities[21]. As is well known, the increased risks of metabolic  
17 diseases associated with obesity occur at lower BMIs in Asians, and these population are predisposed to visceral or abdominal obesity. In a study  
18 of peri- and postmenopausal women in Thai, 34% was proposed as the optimal BF% cut-off points to identify women at risk of metabolic  
19 syndrome[22]. In addition, A cross-sectional study of the middle-aged Japanese men shown that the cut-off point of BF% for detecting participants  
20 with 1 or more CVD risk factors (diabetes mellitus, hypertension, dyslipidemia) was 20.3%[23]. Joseph, *et al.* recommended an optimal BF% cut-  
21 off values of 25.5 in men and 38.0 in women for Asian Indian individuals[24]. Furthermore, Kim, *et al* reported that a BF% of 21% for men and  
22 37% for women may be the appropriate cut-off values in Korean adults[25]. These discrepancies mainly results from different ethnic groups, age  
23 and outcome. By now, BF% has not been recommended as an adiposity index in the Chinese population yet, and there has been little study on the  
24 cutoff point for BF%. Li, *et al* proposed 25% and 35% as optimal BF% cut-off points for Chinese men and women to predict metabolic syndrome  
25 and Type 2 diabetes using data from the Shanghai Diabetes Studies (SHDS), respectively[8]. In this study, the optimal cut-off values of BF% to  
26 detect diabetes, hypertension, and dyslipidemia for men and women in Han adults were found to be 24% and 34%, respectively. In Mongolian  
27 population, the optimal BF% cut-offs were 25% for men and 35% for women. Mongolians have a distinctive lifestyle and dietary habits  
28 characterized by a preference for high protein and fatty foods of animal origin[26], which is different from Han population. Zhang, *et al* reported  
29 the prevalence of overweight or obesity was higher in Mongolian people than Han people using WHO criteria (26.1% vs 21.3%, respectively).  
30 Moreover, a study evaluating the relationship among ethnic groups and their CVD risk factors (hypertension, obesity, diabetes, dyslipidemia,  
31 smoking) shown that clustering of  $\geq 2$  or  $\geq 3$  of these risk factors was noted in 66.9% or 36.5% of Mongolian as well as 62.0% or 28.3% of Han  
32 subjects, respectively[27]. Because of different ethnicities, the optimal BF% cut-offs of Han adults may be not the same as Mongolian.  
33  
34  
35

36 The current definitions of obesity using BF% are based on Western populations and probably need to be modified for Chinese population. The  
37 present study showed the optimal BF% cut-off points for men and women were around 24.0% and 34.0% in Han adults, and 25.0% and 35.0% in  
38 Mongolian population, respectively.  
39  
40  
41  
42

1  
2  
3  
4  
5 **Acknowledgments** This study was supported by the National Science & Technology Pillar Program during the 12<sup>th</sup> Five-year Plan Period, Grant  
6 2012BAI37B02 from the Ministry of Science and Technology, Beijing, People's Republic of China to Guangliang Shan, which enabled the  
7 completion of the project. We sincerely express our gratitude to all the staff of Inner Mongolia Autonomous Region Center for Disease Control  
8 and Prevention for support with the collection of demographic data.  
9

10 **Contributors** YL participated in the data collection and drafted the manuscript. HW, WW, HG, YQ, GX, GL participated in the data collection.  
11 KW, FD, LP, GZ, GS participated in the design of the study and undertook statistical analyses. All authors were involved in writing the paper and  
12 had final approval of the submitted and published versions.  
13

14 **Funding** This study was supported by the National Science & Technology Pillar Program during the 12<sup>th</sup> Five-year Plan Period, Grant  
15 2012BAI37B02 from the Ministry of Science and Technology, Beijing, People's Republic of China to Guangliang Shan.  
16

17 **Competing interests** None declared.  
18

19 **Ethics approval** The study was approved by the Institutional Review Board of the Institute of Basic Medical Sciences, Chinese Academy of  
20 Medical Sciences(NO.028-2013).  
21

22 **Provenance and peer review** Not commissioned; externally peer reviewed.  
23

24 **Data sharing statement** No additional data are available.  
25

## 26 **References**

- 27
- 28 1. Trends in adult body-mass index in 200 countries from 1975 to 2014: a pooled analysis of 1698 population-based measurement studies  
29 with 19.2 million participants. *Lancet* 2016;387:1377-1396.
- 30 2. Mi YJ, Zhang B, Wang HJ, *et al.* Prevalence and Secular Trends in Obesity Among Chinese Adults, 1991-2011. *Am J Prev Med*  
31 2015;49:661-669.
- 32 3. Lavie CJ, McAuley PA, Church TS, *et al.* Obesity and cardiovascular diseases: implications regarding fitness, fatness, and severity in the  
33 obesity paradox. *J Am Coll Cardiol* 2014;63:1345-1354.
- 34 4. Habib SS. Body mass index and body fat percentage in assessment of obesity prevalence in saudi adults. *Biomed Environ Sci* 2013;26:94-  
35 99.
- 36 5. Meeuwse S, Horgan GW, Elia M. The relationship between BMI and percent body fat, measured by bioelectrical impedance, in a large  
37 adult sample is curvilinear and influenced by age and sex. *Clin Nutr* 2010;29:560-566.
- 38 6. Physical status: the use and interpretation of anthropometry. Report of a WHO Expert Committee. *World Health Organ Tech Rep Ser*  
39 1995;854:1-452.  
40  
41

7. Deurenberg P, Deurenberg-Yap M. Validity of body composition methods across ethnic population groups. *Acta Diabetol* 2003;40 Suppl 1:S246-249.
8. Li L, Wang C, Bao Y, *et al.* Optimal body fat percentage cut-offs for obesity in Chinese adults. *Clin Exp Pharmacol Physiol* 2012;39:393-398.
9. Wang C, Hou XH, Zhang ML, *et al.* Comparison of body mass index with body fat percentage in the evaluation of obesity in Chinese. *Biomed Environ Sci* 2010;23:173-179.
10. Dugee O, Khor GL, Lye MS, *et al.* Association of major dietary patterns with obesity risk among Mongolian men and women. *Asia Pac J Clin Nutr* 2009;18:433-440.
11. Li G, Wang H, Wang K, *et al.* Prevalence, awareness, treatment, control and risk factors related to hypertension among urban adults in Inner Mongolia 2014: differences between Mongolian and Han populations. *BMC Public Health* 2016;16:294.
12. Romero-Corral A, Somers VK, Sierra-Johnson J, *et al.* Accuracy of body mass index in diagnosing obesity in the adult general population. *Int J Obes (Lond)* 2008;32:959-966.
13. Goonasegaran AR, Nabila FN, Shuhada NS. Comparison of the effectiveness of body mass index and body fat percentage in defining body composition. *Singapore Med J* 2012;53:403-408.
14. Kim JY, Han SH, Yang BM. Implication of high-body-fat percentage on cardiometabolic risk in middle-aged, healthy, normal-weight adults. *Obesity (Silver Spring)* 2013;21:1571-1577.
15. Gomez-Ambrosi J, Silva C, Galofre JC, *et al.* Body adiposity and type 2 diabetes: increased risk with a high body fat percentage even having a normal BMI. *Obesity (Silver Spring)* 2011;19:1439-1444.
16. Lamb MM, Ogden CL, Carroll MD, *et al.* Association of body fat percentage with lipid concentrations in children and adolescents: United States, 1999-2004. *Am J Clin Nutr* 2011;94:877-883.
17. Shea JL, King MT, Yi Y, *et al.* Body fat percentage is associated with cardiometabolic dysregulation in BMI-defined normal weight subjects. *Nutr Metab Cardiovasc Dis* 2012;22:741-747.
18. Hodge S, Bunting BP, Carr E, *et al.* Obesity, whole blood serotonin and sex differences in healthy volunteers. *Obes Facts* 2012;5:399-407.
19. Park JK, Lim YH, Kim KS, *et al.* Body fat distribution after menopause and cardiovascular disease risk factors: Korean National Health and Nutrition Examination Survey 2010. *J Womens Health (Larchmt)* 2013;22:587-594.
20. Dasgupta S, Salman M, Lokesh S, *et al.* Menopause versus aging: The predictor of obesity and metabolic aberrations among menopausal women of Karnataka, South India. *J Midlife Health* 2012;3:24-30.
21. Carroll JF, Chiapa AL, Rodriquez M, *et al.* Visceral fat, waist circumference, and BMI: impact of race/ethnicity. *Obesity (Silver Spring)* 2008;16:600-607.
22. Bintvihok W, Chaikittisilpa S, Panyakamlerd K, *et al.* Cut-off value of body fat in association with metabolic syndrome in Thai peri- and postmenopausal women. *Climacteric* 2013;16:393-397.

- 1  
2  
3  
4  
5 23. Yamashita K, Kondo T, Osugi S, *et al.* The significance of measuring body fat percentage determined by bioelectrical impedance analysis for detecting subjects with cardiovascular disease risk factors. *Circ J* 2012;76:2435-2442.
- 6  
7 24. Joseph L, Wasir JS, Misra A, *et al.* Appropriate values of adiposity and lean body mass indices to detect cardiovascular risk factors in Asian Indians. *Diabetes Technol Ther* 2011;13:899-906.
- 8  
9 25. Kim CH, Park HS, Park M, *et al.* Optimal cutoffs of percentage body fat for predicting obesity-related cardiovascular disease risk factors in Korean adults. *Am J Clin Nutr* 2011;94:34-39.
- 10  
11 26. Otgontuya D, Jr., Khor GL, Lye MS, *et al.* Obesity among Mongolian Adults from Urban and Rural Areas. *Malays J Nutr* 2009;15:185-194.
- 12  
13 27. Li N, Wang H, Yan Z, *et al.* Ethnic disparities in the clustering of risk factors for cardiovascular disease among the Kazakh, Uygur, Mongolian and Han populations of Xinjiang: a cross-sectional study. *BMC Public Health* 2012;12:499.
- 14  
15  
16  
17  
18  
19  
20  
21  
22  
23  
24  
25  
26  
27  
28  
29  
30  
31  
32  
33  
34  
35  
36  
37  
38  
39  
40  
41  
42  
43  
44  
45  
46  
47  
48  
49



1  
2  
3  
4  
5  
6  
7  
8  
9  
10  
11  
12  
13  
14  
15  
16  
17  
18  
19  
20  
21  
22  
23  
24  
25  
26  
27  
28  
29  
30  
31  
32  
33  
34  
35  
36  
37  
38  
39  
40  
41  
42  
43  
44  
45  
46  
47  
48  
49  
50  
51  
52  
53  
54  
55  
56  
57  
58  
59  
60

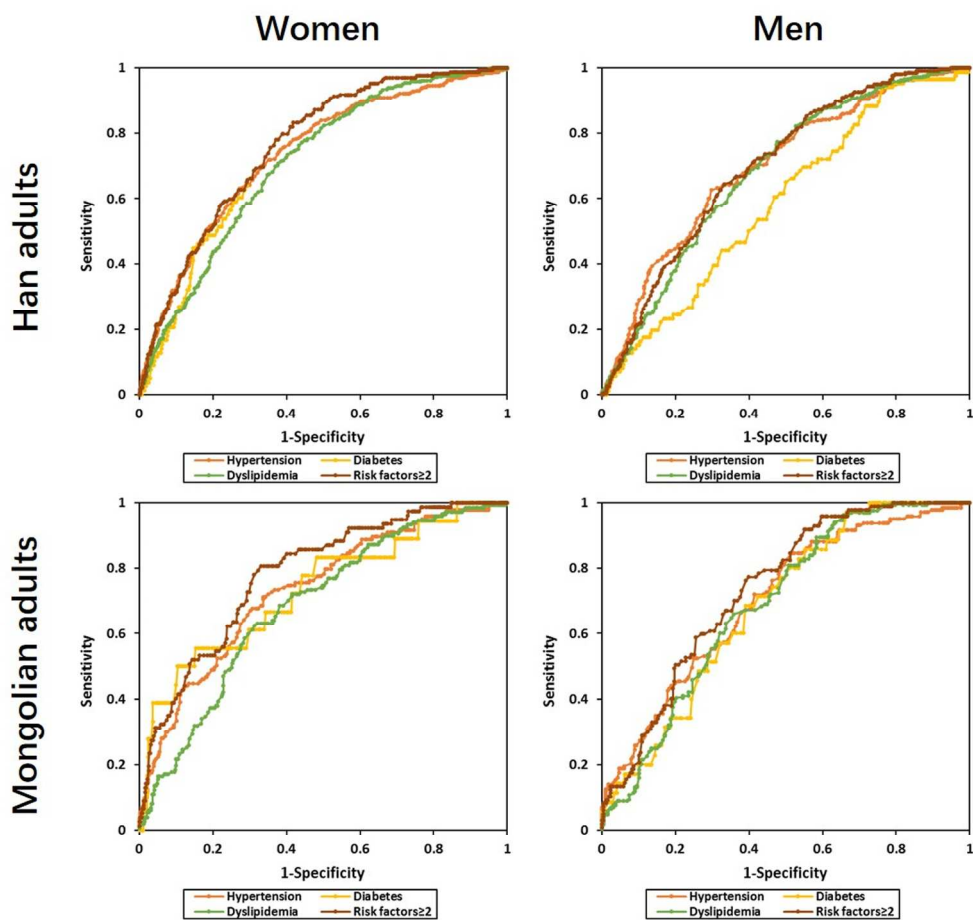

Figure 1 ROC curves for BF% screening CVD risk factors.  
Optimal body fat percentage cu  
283x267mm (300 x 300 DPI)

only

## STROBE Statement—checklist of items that should be included in reports of observational studies

|                          | Item No | Recommendation                                                                                                                                                                                                                                                                                                                                                                                                                                                         | Page No |
|--------------------------|---------|------------------------------------------------------------------------------------------------------------------------------------------------------------------------------------------------------------------------------------------------------------------------------------------------------------------------------------------------------------------------------------------------------------------------------------------------------------------------|---------|
| Title and abstract       | 1       | (a) Indicate the study's design with a commonly used term in the title or the abstract                                                                                                                                                                                                                                                                                                                                                                                 | 1-2     |
|                          |         | (b) Provide in the abstract an informative and balanced summary of what was done and what was found                                                                                                                                                                                                                                                                                                                                                                    | 2       |
| <b>Introduction</b>      |         |                                                                                                                                                                                                                                                                                                                                                                                                                                                                        |         |
| Background/rationale     | 2       | Explain the scientific background and rationale for the investigation being reported                                                                                                                                                                                                                                                                                                                                                                                   | 3       |
| Objectives               | 3       | State specific objectives, including any prespecified hypotheses                                                                                                                                                                                                                                                                                                                                                                                                       | 3       |
| <b>Methods</b>           |         |                                                                                                                                                                                                                                                                                                                                                                                                                                                                        |         |
| Study design             | 4       | Present key elements of study design early in the paper                                                                                                                                                                                                                                                                                                                                                                                                                | 3-4     |
| Setting                  | 5       | Describe the setting, locations, and relevant dates, including periods of recruitment, exposure, follow-up, and data collection                                                                                                                                                                                                                                                                                                                                        | 3-4     |
| Participants             | 6       | (a) <i>Cohort study</i> —Give the eligibility criteria, and the sources and methods of selection of participants. Describe methods of follow-up<br><i>Case-control study</i> —Give the eligibility criteria, and the sources and methods of case ascertainment and control selection. Give the rationale for the choice of cases and controls<br><i>Cross-sectional study</i> —Give the eligibility criteria, and the sources and methods of selection of participants | 3-4     |
|                          |         | (b) <i>Cohort study</i> —For matched studies, give matching criteria and number of exposed and unexposed<br><i>Case-control study</i> —For matched studies, give matching criteria and the number of controls per case                                                                                                                                                                                                                                                 |         |
| Variables                | 7       | Clearly define all outcomes, exposures, predictors, potential confounders, and effect modifiers. Give diagnostic criteria, if applicable                                                                                                                                                                                                                                                                                                                               | 4       |
| Data sources/measurement | 8*      | For each variable of interest, give sources of data and details of methods of assessment (measurement). Describe comparability of assessment methods if there is more than one group                                                                                                                                                                                                                                                                                   | 4       |
| Bias                     | 9       | Describe any efforts to address potential sources of bias                                                                                                                                                                                                                                                                                                                                                                                                              | 4       |
| Study size               | 10      | Explain how the study size was arrived at                                                                                                                                                                                                                                                                                                                                                                                                                              | 4       |
| Quantitative variables   | 11      | Explain how quantitative variables were handled in the analyses. If applicable, describe which groupings were chosen and why                                                                                                                                                                                                                                                                                                                                           | 4       |
| Statistical methods      | 12      | (a) Describe all statistical methods, including those used to control for confounding                                                                                                                                                                                                                                                                                                                                                                                  | 4-5     |
|                          |         | (b) Describe any methods used to examine subgroups and interactions                                                                                                                                                                                                                                                                                                                                                                                                    | 4-5     |
|                          |         | (c) Explain how missing data were addressed                                                                                                                                                                                                                                                                                                                                                                                                                            |         |
|                          |         | (d) <i>Cohort study</i> —If applicable, explain how loss to follow-up was addressed<br><i>Case-control study</i> —If applicable, explain how matching of cases and controls was addressed<br><i>Cross-sectional study</i> —If applicable, describe analytical methods taking account of sampling strategy                                                                                                                                                              |         |
|                          |         | (e) Describe any sensitivity analyses                                                                                                                                                                                                                                                                                                                                                                                                                                  |         |

| Results                  |     |                                                                                                                                                                                                              | Page No |
|--------------------------|-----|--------------------------------------------------------------------------------------------------------------------------------------------------------------------------------------------------------------|---------|
| Participants             | 13* | (a) Report numbers of individuals at each stage of study—eg numbers potentially eligible, examined for eligibility, confirmed eligible, included in the study, completing follow-up, and analysed            | 3,5     |
|                          |     | (b) Give reasons for non-participation at each stage                                                                                                                                                         | 3,5     |
|                          |     | (c) Consider use of a flow diagram                                                                                                                                                                           |         |
| Descriptive data         | 14* | (a) Give characteristics of study participants (eg demographic, clinical, social) and information on exposures and potential confounders                                                                     | 5       |
|                          |     | (b) Indicate number of participants with missing data for each variable of interest                                                                                                                          |         |
|                          |     | (c) <i>Cohort study</i> —Summarise follow-up time (eg, average and total amount)                                                                                                                             |         |
| Outcome data             | 15* | <i>Cohort study</i> —Report numbers of outcome events or summary measures over time                                                                                                                          |         |
|                          |     | <i>Case-control study</i> —Report numbers in each exposure category, or summary measures of exposure                                                                                                         |         |
|                          |     | <i>Cross-sectional study</i> —Report numbers of outcome events or summary measures                                                                                                                           | 5-10    |
| Main results             | 16  | (a) Give unadjusted estimates and, if applicable, confounder-adjusted estimates and their precision (eg, 95% confidence interval). Make clear which confounders were adjusted for and why they were included | 10-11   |
|                          |     | (b) Report category boundaries when continuous variables were categorized                                                                                                                                    |         |
|                          |     | (c) If relevant, consider translating estimates of relative risk into absolute risk for a meaningful time period                                                                                             |         |
| Other analyses           | 17  | Report other analyses done—eg analyses of subgroups and interactions, and sensitivity analyses                                                                                                               |         |
| <b>Discussion</b>        |     |                                                                                                                                                                                                              |         |
| Key results              | 18  | Summarise key results with reference to study objectives                                                                                                                                                     | 11      |
| Limitations              | 19  | Discuss limitations of the study, taking into account sources of potential bias or imprecision. Discuss both direction and magnitude of any potential bias                                                   | 2       |
| Interpretation           | 20  | Give a cautious overall interpretation of results considering objectives, limitations, multiplicity of analyses, results from similar studies, and other relevant evidence                                   | 11-12   |
| Generalisability         | 21  | Discuss the generalisability (external validity) of the study results                                                                                                                                        | 12      |
| <b>Other information</b> |     |                                                                                                                                                                                                              |         |
| Funding                  | 22  | Give the source of funding and the role of the funders for the present study and, if applicable, for the original study on which the present article is based                                                | 13      |

\*Give information separately for cases and controls in case-control studies and, if applicable, for exposed and unexposed groups in cohort and cross-sectional studies.

**Note:** An Explanation and Elaboration article discusses each checklist item and gives methodological background and published examples of transparent reporting. The STROBE checklist is best used in conjunction with this article (freely available on the Web sites of PLoS Medicine at <http://www.plosmedicine.org/>, Annals of Internal Medicine at <http://www.annals.org/>, and Epidemiology at <http://www.epidem.com/>). Information on the STROBE Initiative is available at [www.strobe-statement.org](http://www.strobe-statement.org).

# BMJ Open

## Optimal body fat percentage cut-off values for identifying cardiovascular risk factors in Mongolian and Han adults: A Population-based Cross-Sectional Study in Inner Mongolia, China

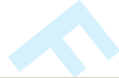

|                                 |                                                                                                                                                                                                                                                                                                                                                                                                                                                                                                                                                                                                                                                                                                                                                                                                                                                                                                                                                                                                                                                                                                                                                                                                                                                                                                                                                                                                                                                                                                                                                                                                                                                                                                                                                                                                                                                                                                                                                                |
|---------------------------------|----------------------------------------------------------------------------------------------------------------------------------------------------------------------------------------------------------------------------------------------------------------------------------------------------------------------------------------------------------------------------------------------------------------------------------------------------------------------------------------------------------------------------------------------------------------------------------------------------------------------------------------------------------------------------------------------------------------------------------------------------------------------------------------------------------------------------------------------------------------------------------------------------------------------------------------------------------------------------------------------------------------------------------------------------------------------------------------------------------------------------------------------------------------------------------------------------------------------------------------------------------------------------------------------------------------------------------------------------------------------------------------------------------------------------------------------------------------------------------------------------------------------------------------------------------------------------------------------------------------------------------------------------------------------------------------------------------------------------------------------------------------------------------------------------------------------------------------------------------------------------------------------------------------------------------------------------------------|
| Journal:                        | <i>BMJ Open</i>                                                                                                                                                                                                                                                                                                                                                                                                                                                                                                                                                                                                                                                                                                                                                                                                                                                                                                                                                                                                                                                                                                                                                                                                                                                                                                                                                                                                                                                                                                                                                                                                                                                                                                                                                                                                                                                                                                                                                |
| Manuscript ID                   | bmjopen-2016-014675.R1                                                                                                                                                                                                                                                                                                                                                                                                                                                                                                                                                                                                                                                                                                                                                                                                                                                                                                                                                                                                                                                                                                                                                                                                                                                                                                                                                                                                                                                                                                                                                                                                                                                                                                                                                                                                                                                                                                                                         |
| Article Type:                   | Research                                                                                                                                                                                                                                                                                                                                                                                                                                                                                                                                                                                                                                                                                                                                                                                                                                                                                                                                                                                                                                                                                                                                                                                                                                                                                                                                                                                                                                                                                                                                                                                                                                                                                                                                                                                                                                                                                                                                                       |
| Date Submitted by the Author:   | 06-Dec-2016                                                                                                                                                                                                                                                                                                                                                                                                                                                                                                                                                                                                                                                                                                                                                                                                                                                                                                                                                                                                                                                                                                                                                                                                                                                                                                                                                                                                                                                                                                                                                                                                                                                                                                                                                                                                                                                                                                                                                    |
| Complete List of Authors:       | <p>Li, Yanlong; Institute of Basic Medical Sciences, Chinese Academy of Medical Sciences, Department of Epidemiology and Statistics; School of Basic Medicine, Peking Union Medical College, Department of Epidemiology and Statistics</p> <p>Wang, Hailing; Inner Mongolia Center for Disease Control and Prevention</p> <p>Wang, Ke; Sichuan University West China Second University Hospital, National Office for Maternal and Child Health Surveillance of China, Department of Obstetrics, Key Laboratory of Birth Defects and Related Diseases of Women and Children (Sichuan University), Ministry of Education</p> <p>Wang, Wenrui; Inner Mongolia Center for Disease Control and Prevention</p> <p>Dong, Fen; China-Japan Friendship Hospital</p> <p>Qian, Yonggang; Inner Mongolia Center for Disease Control and Prevention</p> <p>Gong, Haiying; Fangshan District Center for Disease Control and Prevention</p> <p>Xu, Guodong; China-Japan Friendship Hospital</p> <p>Li, Guoju; Institute of Basic Medical Sciences, Chinese Academy of Medical Sciences,, Department of Epidemiology and Statistics; School of Basic Medicine, Peking Union Medical College, Department of Epidemiology and Statistics</p> <p>Pan, Li; Institute of Basic Medical Sciences, Chinese Academy of Medical Sciences, Department of Epidemiology and Statistics; School of Basic Medicine, Peking Union Medical College, Department of Epidemiology and Statistics</p> <p>Zhu, Guangjin; Institute of Basic Medical Sciences, Chinese Academy of Medical Sciences, Department of Epidemiology and Statistics; School of Basic Medicine, Peking Union Medical College, Department of Epidemiology and Statistics</p> <p>shan, guangliang; Institute of Basic Medical Sciences, Chinese Academy of Medical Sciences, Department of Epidemiology and Statistics; School of Basic Medicine, Peking Union Medical College, Department of Epidemiology and Statistics</p> |
| <b>Primary Subject Heading</b>: | Epidemiology                                                                                                                                                                                                                                                                                                                                                                                                                                                                                                                                                                                                                                                                                                                                                                                                                                                                                                                                                                                                                                                                                                                                                                                                                                                                                                                                                                                                                                                                                                                                                                                                                                                                                                                                                                                                                                                                                                                                                   |
| Secondary Subject Heading:      | Public health                                                                                                                                                                                                                                                                                                                                                                                                                                                                                                                                                                                                                                                                                                                                                                                                                                                                                                                                                                                                                                                                                                                                                                                                                                                                                                                                                                                                                                                                                                                                                                                                                                                                                                                                                                                                                                                                                                                                                  |
| Keywords:                       | body composition, obesity, cardiovascular risk factors                                                                                                                                                                                                                                                                                                                                                                                                                                                                                                                                                                                                                                                                                                                                                                                                                                                                                                                                                                                                                                                                                                                                                                                                                                                                                                                                                                                                                                                                                                                                                                                                                                                                                                                                                                                                                                                                                                         |

1  
2  
3  
4  
5  
6  
7  
8  
9  
10  
11  
12  
13  
14  
15  
16  
17  
18  
19  
20  
21  
22  
23  
24  
25  
26  
27  
28  
29  
30  
31  
32  
33  
34  
35  
36  
37  
38  
39  
40  
41  
42  
43  
44  
45  
46  
47  
48  
49  
50  
51  
52  
53  
54  
55  
56  
57  
58  
59  
60

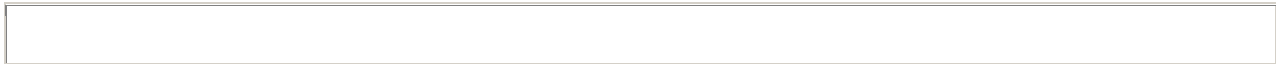

SCHOLARONE™  
Manuscripts

For peer review only

1  
2  
3 **Optimal body fat percentage cut-off values for identifying cardiovascular risk factors in**  
4 **Mongolian and Han adults: A Population-based Cross-Sectional Study in Inner Mongolia,**  
5 **China**  
6

7 Yanlong Li<sup>1</sup>, Hailing Wang<sup>2</sup>, Ke Wang<sup>3</sup>, Wenrui Wang<sup>2</sup>, Fen Dong<sup>4</sup>, Yonggang Qian<sup>2</sup>, Haiying  
8 Gong<sup>5</sup>, Guodong Xu<sup>4</sup>, Guoju Li<sup>1</sup>, Li Pan<sup>1</sup>, Guangjin Zhu<sup>1</sup>, Guangliang Shan<sup>1</sup>  
9

10 <sup>1</sup> Department of Epidemiology and Statistics, Institute of Basic Medical Sciences, Chinese  
11 Academy of Medical Sciences, School of Basic Medicine, Peking Union Medical College,  
12 Beijing, China  
13

14 <sup>2</sup> Inner Mongolia Center for Disease Control and Prevention, Hohhot, China

15 <sup>3</sup> National Office for Maternal and Child Health Surveillance of China, Department of Obstetrics,  
16 Key Laboratory of Birth Defects and Related Diseases of Women and Children (Sichuan  
17 University), Ministry of Education, West China Second University Hospital, Sichuan University,  
18 Chengdu, China.  
19

20 <sup>4</sup> China-Japan Friendship Hospital, Beijing, China

21 <sup>5</sup> Fangshan District Center for Disease Control and Prevention, Beijing, China  
22

23 **Keywords:** body composition, obesity, cardiovascular risk factors  
24

25 **Running Title:** Optimal BF% cut-offs in Chinese  
26

27 **Corresponding Author:**  
28

29 Guangliang Shan  
30

31 Department of Epidemiology and Statistics, Institute of Basic Medical Sciences, Chinese  
32 Academy of Medical Sciences, School of Basic Medicine, Peking Union Medical College,  
33 Beijing 100005, China  
34

35 [Guangliang\\_shan@163.com](mailto:Guangliang_shan@163.com)  
36

37 **Word Count:** 2675 words  
38

39 **Tables:** 6  
40

41 **Figures:** 1  
42

43 **Supplementary Files:** 0  
44  
45  
46  
47  
48  
49  
50  
51  
52  
53  
54  
55  
56  
57  
58  
59  
60

## Abstract

**Objective:** The present study was designed to determine the optimal cut-off values of body fat percentage (BF%) for the detection of cardiovascular disease (CVD) risk factors in Mongolian and Han adults. **Method:** This cross-sectional study involving 3221 Chinese adults (2308 Han and 913 Mongolian) aged 20-80 years was conducted in Inner Mongolia Autonomous region, China, in 2014. Data from a standardized questionnaire, physical examination, and blood sample were obtained. The BF% was estimated using bioelectrical impedance analysis. Optimal BF% cut-offs were analyzed by receiver operating characteristic (ROC) curves to predict the risk of diabetes, hypertension, dyslipidemia. Binary logistic regression analysis was performed to evaluate the odds ratio (OR) of each CVD risk factor according to obesity defined by BF%.

**Results:** Mean BF% levels were lower in men than in women (22.54±5.77 vs 32.95±6.18 in Han, 23.86±5.72 vs 33.98±6.40 in Mongolian, respectively;  $P<0.001$ ). In Han population, the area under curve (AUC) values for BF% ranged from 0.589 to 0.699 for men and from 0.711 to 0.763 for women. Compared with men, AUCs for diabetes and clustering of  $\geq 2$  risk factors in women were significantly higher ( $P<0.05$ ). The AUCs for BF% in women (0.685-0.783) were similar with those in men (0.686-0.736) for CVD risk factors in Mongolian. In Han adults, the optimal BF% cut-off values to detect CVD risk factors varied from 18.7% to 24.2% in men, and 32.7% to 35.4% in women. In Mongolian population, the optimal cut-off values of BF% for men and women ranged from 21.0% to 24.6% and from 35.7% to 40.0%, respectively. Subjects with high BF% ( $\geq 24\%$  in men,  $\geq 34\%$  in women) had higher risk of CVD risk factors in Han (age-adjusted ORs from 1.479 to 3.680, 2.660 to 4.016, respectively). In Mongolian, adults with high BF% ( $\geq 25\%$  in men,  $\geq 35\%$  in women) had higher risk of CVD risk factors (age-adjusted ORs from 2.587 to 3.772, 2.061 to 4.882, respectively). **Conclusions:** The optimal BF% cut-offs for obesity for the prediction of CVD risk factors in Chinese men and women were approximately 24% and 34% for Han adults, and 25% and 35% for Mongolian population of Inner Mongolia, China, respectively.

## Strengths and limitations of this study

The present study was first designed to determine the optimal cut-off values of BF% for CVD risk factors (hypertension, diabetes, dyslipidemia) and clustering of  $\geq 2$  these risk factors in Chinese population.

This study used a large sample covering most age groups to estimate BF% cut-off values for discriminating CVD risk factors in both sexes, especially in different ethnics (Han and Mongolian) in China.

The prevention of public health problems was evaluated by PARP of BF% cut-offs in sexes and races.

The study characterizes the optimal body fat percentage cut-off values for identifying CVD risk factors in a cross-sectional setting using the occurrence of established CVD risk factors as a proxy risk estimate. Lots of epidemic studies, especially prospective cohort studies, need to be completed to improve cutoff points accuracy of BF% in China.

BF% in this study was measured using bioelectrical impedance analysis, which tends to underestimate body fat in all subjects and in men and women separately. However, considering

1  
2  
3 the convenience and inexpensiveness of BIA, large-scale epidemiological investigations  
4 appropriately use this analysis.  
5

## 6 **Introduction**

7  
8 During the past four decades, the global prevalence of overweight and obesity has risen  
9 dramatically and is now estimated to affect over 600 million people[1]. In China, the prevalence  
10 of obesity approximately tripled from 3.75% in 1991 to 11.3% in 2011 according to diagnostic  
11 criteria of the Working Group on Obesity[2]. It is now identified that obesity essentially increases  
12 the risk of hypertension, diabetes and dyslipidemia, which has a great influence on the morbidity  
13 and mortality of Cardiovascular disease (CVD)[3].  
14

15  
16 Body mass index(BMI) closely correlated with body fatness is recommended by WHO as a  
17 population-level measure of overweight and obesity (BMI $\geq$ 30 or 25 kg/m<sup>2</sup> is defined as obese or  
18 overweight, respectively). However, it may not consistently characterize adiposity across  
19 racial/ethnic groups[4]. Body fat percentage (BF%) as a percentage of total bodyweight has  
20 advantages over BMI in estimating fat mass[5]. The BF% cut-off points for obesity proposed by  
21 the WHO are 25% for men and 35% for women, corresponding a BMI of 30 kg/m<sup>2</sup> in young  
22 Caucasians[6]. It was reported that BMI and percentage of body fat differ across populations[7].  
23 The Chinese tend to have a lower BMI but a higher fat volume. Li and colleagues[8] showed that  
24 the BF% cut-off values for Chinese adults were similar to those proposed by the WHO. However,  
25 a longitudinal epidemiological study[9] reflected that the present Chinese BMI criteria (28 kg/m<sup>2</sup>  
26 for obesity) was relatively inconsistent with WHO BF% criteria in determining obesity. Therefore,  
27 the appropriate BF% cut-off points for Chinese remains inconclusive and needs to be further  
28 studied. Inner Mongolia Autonomous Region located in northern China consists mainly of Han  
29 and Mongolian. Compared with Han population, the dietary pattern of Mongolians tends to be  
30 traditionally rich in whole milk, fats and oils, which might increase greater risk of obesity in  
31 Mongolia [10]. In this study, we aimed to characterize the optimal BF% cut-off points in  
32 Mongolian and Han adults according to its risk for common CVD risk factors, including diabetes,  
33 hypertension and dyslipidemia.  
34  
35  
36

## 37 **Methods**

### 38 **Study population**

39  
40 The present study was based on data from the China National Health Survey (CNHS) in Inner  
41 Mongolia Autonomous region in 2014, which has already been described in detail elsewhere[11].  
42 A total of 3508 examinees aged 20-80 years were found to be eligible for the study. We excluded  
43 individuals with incomplete data for hypertension, diabetes and dyslipidemia status, sex, age and  
44 the anthropometric indices (i.e., BMI, BF%). In addition, pregnant women were excluded. This  
45 resulted in a final analytical sample of 3221 adults (2308 Han and 913 Mongolian).  
46  
47  
48

49 Written informed consent was acquired from each participant before data collection. The study  
50 was approved by the Institutional Review Board of the Institute of Basic Medical Sciences,  
51 Chinese Academy of Medical Sciences.  
52

### 53 **Data collection**

54  
55 A standardized health questionnaire was completed by investigators and contained demographic  
56 information, diseases (particularly hypertension, diabetes) and the family history of diabetes,  
57 cardiovascular disease, or cancer. Anthropometric measurements including height, weight, and  
58  
59



body fat percentage were taken with the subjects after an overnight fast and wearing light clothes and without shoes in the morning. Height was measured to the nearest 0.1cm using a fixed stadiometer. Body weight was measured in an upright position to the nearest 0.1kg. Body weight and body fat percentage was measured by bioelectrical impedance analysis (BIA), with a commercially available body analyzer (BC-420, TANITA, Japan). BMI was calculated as weight in kilograms divided by height in meters squared ( $\text{kg}/\text{m}^2$ ). Blood pressure was taken three times using the electronic sphygmomanometer (HEM-907, OMRON, Japan) and the average was used as the mean blood pressure. All surveys were performed by trained staff.

Blood samples were collected from all participants following an overnight fast. Serum total cholesterol (TC), triglycerides (TG), low-density lipoprotein-cholesterol (LDL-C), high-density lipoprotein-cholesterol (HDL-C), and fasting plasma glucose (FPG) were determined by General Hospital of Chinese PLA.

### Definition

Diabetes was defined as  $\text{FPG} \geq 7.0\text{mmol}/\text{L}$  and/or physician-diagnosed diabetes. Hypertension was defined as mean systolic blood pressure (SBP)  $\geq 140\text{mmHg}$  and/or mean diastolic blood pressure (DBP)  $\geq 90\text{mmHg}$  and/or physician-diagnosed hypertension. Dyslipidemia was defined as follow:  $\text{TC} \geq 6.22\text{mmol}/\text{L}$  and/or  $\text{LDL-C} \geq 4.14\text{mmol}/\text{L}$  and/or  $\text{HDL-C} < 1.04\text{mmol}/\text{L}$  and/or  $\text{TG} \geq 2.26\text{mmol}/\text{L}$ . Clustering of risk factors was defined as presence of  $\geq 2$  CVD risk factors. Overweight and obesity were defined as a subject with  $\text{BMI} \geq 25$  and  $< 30 \text{ kg}/\text{m}^2$ , and  $\text{BMI} \geq 30\text{kg}/\text{m}^2$  respectively,

### Statistical analysis

Statistical analysis was performed using SAS software (version 9.3; SAS Institute, Cary, NC, USA). Continuous variables were presented as  $\text{mean} \pm \text{SD}$ ; comparisons between two groups were used by Student's t test. Categorical variables were expressed as percentages and compared by Chi-square test. Two-tailed *P*-value less than 0.05 was considered statistically significant.

Receive operating characteristic (ROC) curve analysis was performed to using BF% as continuous variable in logistic regression models to obtain accurate estimates of area under the curve (AUC) in relation to hypertension, diabetes, and dyslipidemia, which describe the probability that a test will correctly identify subjects with disease. The optimal cut-off values were defined as the points on the ROC curve where Youden's index (sensitivity+specificity-1) was the maximal. Odd ratios (ORs) and the corresponding 95% confidence interval (CI) were calculated by binary logistic regression analysis to measure the association between obesity defined by BF% and CVD risk factors. PARP (percent of prevalence of a condition/disease in the population due to presence of risk factor or percent of prevalence of a condition/disease in the population that would be reduced if risk factor was removed) for each CVD risk factor was calculated by sex-specific cut-offs for BF%. Formulas for calculation of PARP are given below.

$$\text{PARP} = 100 * P(\text{OR}-1) / [P(\text{OR}-1) + 1] \%$$

(*P*: percent of subjects whose BF% was above the sex-specific cut-off value; *OR*: age-adjusted odds ratios for cardiovascular risk factors in subjects using sex-specific cut-offs for BF%)

### Results

### Base characteristics of subjects

Baseline characteristics for men and women in Han and Mongolian adults are shown in Table 1. In Han adults, men had a higher mean BMI, SBP, DBP, FG, TC, TG, meanwhile a lower BF% and HDL-C than women. LDL-C were comparable between men and women ( $P>0.05$ ). The prevalence of hypertension, diabetes, and dyslipidemia were higher in men than in women. Similarly, in Mongolian adults, men had a higher mean BMI, SBP, DBP, FG, TC, TG, LDL-C whereas a lower BF% and HDL-C than women. The prevalence of CVD risk factors was higher in men than in women. In total, compared with Han population, Mongolian had a higher mean weight, BMI, BF%, TC, LDL-C, HDL-C but a lower TG. Moreover, the prevalence of obesity and hypertension was higher in Mongolian than in Han.

### Area under ROC and optimal cut-offs for predicting CVD risk factors

Figure 1 shows ROC curves of BF% for identifying CVD risk factors in men and women among Han and Mongolian adults. Area under ROC curves of BF% stratified by age groups are summarized in Table 2. In Han population, the AUC of BF% ranged from 0.589 to 0.699 for men and from 0.711 to 0.763 for women. Compared with men, AUCs for diabetes and clustering of  $\geq 2$  risk factors in women were significantly higher ( $P<0.05$ ). In addition, the AUC for CVD risk factors were larger in the younger age group than that in the older in women ( $P<0.05$ ). However, AUCs for cardiovascular risk factors were all comparable between men and women in Mongolian adults ( $P>0.05$ ). Among these, the AUCs of BF% ranged from 0.686 to 0.736 for men and from 0.685 to 0.783 for women. Although BF% performed differently for CVD risk factors in age groups of both sexes, there were no significant difference in the AUCs ( $P>0.05$ ).

Optimal cut-off points of BF% for CVD risk factors in both ethnic groups were given in Table 3, which were identified according to the highest Youden's index on ROC curves. In Han adults, the BF% cut-off values were found to optimally predict the risk of hypertension, diabetes and dyslipidemia varied from 18.7% to 24.2% in men, and 32.7% to 35.4% in women. In addition, the optimal cut-off points of BF% were all higher for women than for men in each CVD risk factor. In Mongolian, the optimal BF% cut-off values for men and women ranged from 21.0% to 24.6% and from 35.7% to 40.0%, respectively. The optimal BF% cut-offs between men and women in Mongolian adults were remarkably different. Basically, the optimal cut-off values of BF% in women were mostly higher for older age group than for the younger in Han and Mongolian adults. However, the optimal BF% cut-off points varied greatly by age and CVD risk factors.

The optimal cut-offs of BF% for identifying CVD risk factors in Han and Mongolian adults were also assessed. Table 4 and Table 5 show the sensitivity, specificity and Youden's index for the various cut-off values for BF% in men and women. Clearly, specificity gradually increased but sensitivity conversely decreased with the increase cut-off values of BF% in men and women. BF% cut-off points of preferable sensitivity and specificity to detect each CVD risk factor and clustering of  $\geq 2$  risk factors were selected as optimal values. In Han population, 24% and 34% were the optimal BF% cut-off values in terms of the Youden's index, sensitivity and specificity for men and women, respectively. In Mongolian, the optimal cut-off points of BF% were 25% for men and 35% for women.

The age-adjusted OR(95%CI) and PARP of each CVD risk factor using sex-specific cut-offs for BF% in Han and Mongolian adults are shown in Table 6. In Han adults, BF% corresponded to significantly higher OR for hypertension and dyslipidemia in men except diabetes, while BF%

1  
2  
3 corresponded to significantly higher OR for all CVD risk factors in women. In Mongolian  
4 population, BF% corresponded to significantly higher OR for all CVD risk factors in both sexes  
5 except diabetes in women. According to PARP analysis, the proportion of Han adults whose BF%  
6  $\geq 24\%$  was about 43% in men. If BF% were controlled below 24%, 53.8% of hypertension, 17.2%  
7 of diabetes, 46.1% of dyslipidemia, and 51.6% of clustering of  $\geq 2$  CVD risk factors would be  
8 prevented. Women whose BF%  $\geq 34\%$  was about 45% in Han women. If BF% were controlled  
9 under 24%, 57.6% of clustering of  $\geq 2$  risk factors would be prevented. In Mongolian, the  
10 proportions of subjects whose BF% above 25% for men and 35% for women were round 46%  
11 and 47%, respectively. If BF% were controlled under 25% for men and 35% for women, 56%-65%  
12 of clustering of  $\geq 2$  risk factors would be prevented.  
13  
14

## 15 Discussion

16  
17 The present study, using data obtained from Han and Mongolian adults from Inner Mongolia,  
18 China showed that BF% performed differently for discriminating CVD risk factors in sex and  
19 ethnicity. The optimal BF% cut-off points for men and women were approximately 24.0% and  
20 34.0% in Han adults, and 25.0% and 35.0% in Mongolian population, respectively. Compared  
21 with WHO criteria, the optimal BF% cut-offs in this study were a little lower in Han adults, but  
22 similar in Mongolian, which were taken account of validity to detect CVD risk factors and  
23 clustering two or more CVD risk factors.  
24  
25

26 BMI is the most widely used measure to diagnose obesity. However, the accuracy of BMI in  
27 detecting excess body adiposity in the general adult population is limited, because BMI cannot  
28 measure BF% directly and poorly distinguishes among total body fat, total body lean, and bone  
29 mass[12, 13]. To overcome misclassifications, direct measurements of BF% would be a better  
30 tool for diagnosing obesity. Moreover, BF% has been found to have a strong association with  
31 multiple CVD risk factors in several studies conducted in China[8], Korea[14], and other ethnic  
32 groups[15-17]. Our data also support the good discrimination of BF% for each CVD risk factor  
33 and clustering of  $\geq 2$  risk factors in both sexes and ethnicities. However, BF% seems performed  
34 better in women than in men to detect CVD risk factors, which might result from greater less  
35 mass and lower fat mass men had than women[18]. Besides, BF% had larger AUCs for almost  
36 CVD risk factors in women aged  $< 50$  years than in the older women, but not obviously in men. In  
37 a Korean study, women after menopause had not only higher total body fat percentage but also its  
38 different distribution, which independently correlates with cardiovascular disease risk factors[19].  
39 In addition, a study of 402 women aged 30-75 years in Southern India also shown that  
40 menopausal status and associated obesity created a compatible atmosphere for abnormal  
41 metabolism and aggravated cardio metabolic risk factors[20]. However, the relationship between  
42 obesity in women after menopause and CVD risk factors is more vulnerable to the effect of  
43 confounding variables, such as ageing, which might affect the accuracy of prediction of BF% for  
44 CVD risk factors.  
45  
46  
47  
48

49 It has been demonstrated that adipose tissue distribution varies among different ethnicities[21].  
50 As is well known, the increased risks of metabolic diseases associated with obesity occur at lower  
51 BMIs in Asians, and these population are predisposed to visceral or abdominal obesity. In a study  
52 of peri- and postmenopausal women in Thai, 34% was proposed as the optimal BF% cut-off  
53 points to identify women at risk of metabolic syndrome[22]. In addition, A cross-sectional study  
54 of the middle-aged Japanese men shown that the cut-off point of BF% for detecting participants  
55 with 1 or more CVD risk factors (diabetes mellitus, hypertension, dyslipidemia) was 20.3%[23].  
56 Joseph, *et al.* recommended an optimal BF% cut-off values of 25.5 in men and 38.0 in women for  
57  
58  
59

1  
2  
3 Asian Indian individuals[24]. Furthermore, Kim, *et al* reported that a BF% of 21% for men and  
4 37% for women may be the appropriate cut-off values in Korean adults[25]. These discrepancies  
5 mainly result from different ethnic groups, age and outcome. By now, BF% has not been  
6 recommended as an adiposity index in the Chinese population yet, and there has been little study  
7 on the cutoff point for BF%. Li, *et al* proposed 25% and 35% as optimal BF% cut-off points for  
8 Chinese men and women to predict metabolic syndrome and Type 2 diabetes using data from the  
9 Shanghai Diabetes Studies (SHDS), respectively[8]. In this study, the optimal cut-off values of  
10 BF% to detect diabetes, hypertension, and dyslipidemia for men and women in Han adults were  
11 found to be 24% and 34%, respectively. In Mongolian population, the optimal BF% cut-offs were  
12 25% for men and 35% for women. Mongolians have a distinctive lifestyle and dietary habits  
13 characterized by a preference for high protein and fatty foods of animal origin[26], which is  
14 different from Han population. Zhang, *et al* reported the prevalence of overweight or obesity was  
15 higher in Mongolian people than Han people using WHO criteria (26.1% vs 21.3%,  
16 respectively)[27]. Moreover, a study evaluating the relationship among ethnic groups and their  
17 CVD risk factors (hypertension, obesity, diabetes, dyslipidemia, smoking) shown that clustering  
18 of  $\geq 2$  or  $\geq 3$  of these risk factors was noted in 66.9% or 36.5% of Mongolian as well as 62.0% or  
19 28.3% of Han subjects, respectively[28]. Because of different genetic backgrounds, lifestyles and  
20 dietary patterns, the optimal BF% cut-offs of Han adults may be not the same as Mongolian.

21  
22  
23  
24  
25 There are some limitations to our study. A major limitation of the present study is cross-sectional  
26 design, which cannot be used to establish temporal relationship and causality. Lots of epidemic  
27 studies, especially prospective cohort studies, need to be completed to improve cutoff points  
28 accuracy of BF% in China. Second, BF% in this study was measured using bioelectrical  
29 impedance analysis, which tends to underestimate body fat in all subjects and in men and women  
30 separately[29]. However, considering the convenience and inexpensiveness of BIA, large-scale  
31 epidemiological investigations appropriately use this analysis. Finally, the subjects were from  
32 Inner Mongolia, so the study's findings cannot necessarily be representative of all Chinese adults,  
33 especially Han people.

34  
35  
36 The current definitions of obesity using BF% are based on Western populations and probably  
37 need to be modified for Chinese population. The present study showed the optimal BF% cut-off  
38 points for men and women were around 24.0% and 34.0% in Han adults, and 25.0% and 35.0% in  
39 Mongolian population of Inner Mongolia, China, respectively. Considering the rapid growth of  
40 obesity in China[2], these optimal body fat percentage cut-offs will contribute to public health  
41 prevention and intervention.

42  
43  
44 **Acknowledgments** This study was supported by the National Science & Technology Pillar  
45 Program during the 12<sup>th</sup> Five-year Plan Period, Grant 2012BAI37B02 from the Ministry of  
46 Science and Technology, Beijing, People's Republic of China to Guangliang Shan, which  
47 enabled the completion of the project. We sincerely express our gratitude to all the staff of Inner  
48 Mongolia Autonomous Region Center for Disease Control and Prevention for support with the  
49 collection of demographic data.

50  
51  
52 **Contributors** YL participated in the data collection and drafted the manuscript. HW, WW, HG,  
53 YQ, GX, GL participated in the data collection. KW, FD, LP, GZ, GS participated in the design  
54 of the study and undertook statistical analyses. All authors were involved in writing the paper and  
55 had final approval of the submitted and published versions.

**Funding** This study was supported by the National Science & Technology Pillar Program during the 12<sup>th</sup> Five-year Plan Period, Grant 2012BAI37B02 from the Ministry of Science and Technology, Beijing, People's Republic of China to Guangliang Shan.

**Competing interests** None declared.

**Ethics approval** The study was approved by the Institutional Review Board of the Institute of Basic Medical Sciences, Chinese Academy of Medical Sciences(NO.028-2013).

**Provenance and peer review** Not commissioned; externally peer reviewed.

**Data sharing statement** No additional data are available.

## References

1. Trends in adult body-mass index in 200 countries from 1975 to 2014: a pooled analysis of 1698 population-based measurement studies with 19.2 million participants. *Lancet* 2016;387:1377-1396.
2. Mi YJ, Zhang B, Wang HJ, Yan J, Han W, Zhao J, *et al.* Prevalence and Secular Trends in Obesity Among Chinese Adults, 1991-2011. *Am J Prev Med* 2015;49:661-669.
3. Lavie CJ, McAuley PA, Church TS, Milani RV, Blair SN. Obesity and cardiovascular diseases: implications regarding fitness, fatness, and severity in the obesity paradox. *J Am Coll Cardiol* 2014;63:1345-1354.
4. Habib SS. Body mass index and body fat percentage in assessment of obesity prevalence in saudi adults. *Biomed Environ Sci* 2013;26:94-99.
5. Meeuwse S, Horgan GW, Elia M. The relationship between BMI and percent body fat, measured by bioelectrical impedance, in a large adult sample is curvilinear and influenced by age and sex. *Clin Nutr* 2010;29:560-566.
6. Physical status: the use and interpretation of anthropometry. Report of a WHO Expert Committee. *World Health Organ Tech Rep Ser* 1995;854:1-452.
7. Deurenberg P, Deurenberg-Yap M. Validity of body composition methods across ethnic population groups. *Acta Diabetol* 2003;40 Suppl 1:S246-249.
8. Li L, Wang C, Bao Y, Peng L, Gu H, Jia W. Optimal body fat percentage cut-offs for obesity in Chinese adults. *Clin Exp Pharmacol Physiol* 2012;39:393-398.
9. Wang C, Hou XH, Zhang ML, Bao YQ, Zou YH, Zhong WH, *et al.* Comparison of body mass index with body fat percentage in the evaluation of obesity in Chinese. *Biomed Environ Sci* 2010;23:173-179.
10. Dugee O, Khor GL, Lye MS, Luvsannyam L, Janchiv O, Jamyan B, *et al.* Association of major dietary patterns with obesity risk among Mongolian men and women. *Asia Pac J Clin Nutr* 2009;18:433-440.
11. Li G, Wang H, Wang K, Wang W, Dong F, Qian Y, *et al.* Prevalence, awareness, treatment, control and risk factors related to hypertension among urban adults in Inner Mongolia 2014: differences between Mongolian and Han populations. *BMC Public Health* 2016;16:294.
12. Romero-Corral A, Somers VK, Sierra-Johnson J, Thomas RJ, Collazo-Clavell ML, Korinek J, *et al.* Accuracy of body mass index in diagnosing obesity in the adult general population. *Int J Obes (Lond)* 2008;32:959-966.
13. Goonasegaran AR, Nabila FN, Shuhada NS. Comparison of the effectiveness of body mass index and body fat percentage in defining body composition. *Singapore Med J* 2012;53:403-408.

14. Kim JY, Han SH, Yang BM. Implication of high-body-fat percentage on cardiometabolic risk in middle-aged, healthy, normal-weight adults. *Obesity (Silver Spring)* 2013;21:1571-1577.
15. Gomez-Ambrosi J, Silva C, Galofre JC, Escalada J, Santos S, Gil MJ, *et al.* Body adiposity and type 2 diabetes: increased risk with a high body fat percentage even having a normal BMI. *Obesity (Silver Spring)* 2011;19:1439-1444.
16. Lamb MM, Ogden CL, Carroll MD, Lacher DA, Flegal KM. Association of body fat percentage with lipid concentrations in children and adolescents: United States, 1999-2004. *Am J Clin Nutr* 2011;94:877-883.
17. Shea JL, King MT, Yi Y, Gulliver W, Sun G. Body fat percentage is associated with cardiometabolic dysregulation in BMI-defined normal weight subjects. *Nutr Metab Cardiovasc Dis* 2012;22:741-747.
18. Hodge S, Bunting BP, Carr E, Strain JJ, Stewart-Knox BJ. Obesity, whole blood serotonin and sex differences in healthy volunteers. *Obes Facts* 2012;5:399-407.
19. Park JK, Lim YH, Kim KS, Kim SG, Kim JH, Lim HG, *et al.* Body fat distribution after menopause and cardiovascular disease risk factors: Korean National Health and Nutrition Examination Survey 2010. *J Womens Health (Larchmt)* 2013;22:587-594.
20. Dasgupta S, Salman M, Lokesh S, Xaviour D, Saheb SY, Prasad BV, *et al.* Menopause versus aging: The predictor of obesity and metabolic aberrations among menopausal women of Karnataka, South India. *J Midlife Health* 2012;3:24-30.
21. Carroll JF, Chiapa AL, Rodriguez M, Phelps DR, Cardarelli KM, Vishwanatha JK, *et al.* Visceral fat, waist circumference, and BMI: impact of race/ethnicity. *Obesity (Silver Spring)* 2008;16:600-607.
22. Bintvihok W, Chaikittisilpa S, Panyakamlerd K, Jaisamrarn U, Taechakraichana N. Cut-off value of body fat in association with metabolic syndrome in Thai peri- and postmenopausal women. *Climacteric* 2013;16:393-397.
23. Yamashita K, Kondo T, Osugi S, Shimokata K, Maeda K, Okumura N, *et al.* The significance of measuring body fat percentage determined by bioelectrical impedance analysis for detecting subjects with cardiovascular disease risk factors. *Circ J* 2012;76:2435-2442.
24. Joseph L, Wasir JS, Misra A, Vikram NK, Goel K, Pandey RM, *et al.* Appropriate values of adiposity and lean body mass indices to detect cardiovascular risk factors in Asian Indians. *Diabetes Technol Ther* 2011;13:899-906.
25. Kim CH, Park HS, Park M, Kim H, Kim C. Optimal cutoffs of percentage body fat for predicting obesity-related cardiovascular disease risk factors in Korean adults. *Am J Clin Nutr* 2011;94:34-39.
26. Otgontuya D, Jr., Khor GL, Lye MS, Norhaizan ME. Obesity among Mongolian Adults from Urban and Rural Areas. *Malays J Nutr* 2009;15:185-194.
27. Zhang X, Sun Z, Zheng L, Liu S, Xu C, Li J, *et al.* Ethnic differences in overweight and obesity between Han and Mongolian rural Chinese. *Acta Cardiologica* 2009;64:239-245.
28. Li N, Wang H, Yan Z, Yao X, Hong J, Zhou L. Ethnic disparities in the clustering of risk factors for cardiovascular disease among the Kazakh, Uygur, Mongolian and Han populations of Xinjiang: a cross-sectional study. *BMC Public Health* 2012;12:499.
29. Sun G, French CR, Martin GR, Younghusband B, Green RC, Xie YG, *et al.* Comparison of multifrequency bioelectrical impedance analysis with dual-energy X-ray absorptiometry for assessment of percentage body fat in a large, healthy population. *Am J Clin Nutr* 2005;81:74-78.

1  
2  
3  
4  
5  
6  
7  
8  
9  
10  
11  
12  
13  
14  
15  
16  
17  
18  
19  
20  
21  
22  
23  
24  
25  
26  
27  
28  
29  
30  
31  
32  
33  
34  
35  
36  
37  
38  
39  
40  
41  
42  
43  
44  
45  
46  
47  
48  
49  
50  
51  
52  
53  
54  
55  
56  
57  
58  
59  
60

For peer review only

**Table 1.** Baseline Characteristics by sex in Han and Mongolian adults

| Variables               | Han(n=2308)     |               |                | Mongolian(n=913) |              |              |
|-------------------------|-----------------|---------------|----------------|------------------|--------------|--------------|
|                         | Men(n=898)      | Women(n=1410) | All cases      | Men(n=355)       | Women(n=558) | All cases    |
| Age(years)              | 46.20±14.05***  | 44.24±13.29   | 45.00±13.62    | 45.91±13.69**    | 43.34±13.03  | 44.34±13.34  |
| Age groups (%)          | ***             |               |                | ***              |              |              |
| 20-49                   | 58.02           | 66.52         | 63.21          | 57.75            | 68.64        | 64.4         |
| 50-80                   | 41.98           | 33.48         | 36.79          | 42.25            | 31.36        | 35.6         |
| Height(cm)              | 170.12±5.94***  | 158.28±5.51   | 162.89±8.10    | 170.54±6.35***   | 158.53±5.46  | 163.21±8.26  |
| Weight(kg)              | 72.92±12.18***  | 60.20±9.70    | 65.15±12.39### | 75.11±12.96***   | 61.54±10.08  | 66.82±13.08  |
| BMI(kg/m <sup>2</sup> ) | 25.17±3.82***   | 24.04±3.72    | 24.48±3.80###  | 25.78±3.96***    | 24.52±4.07   | 25.01±4.07   |
| BMI groups (%)          | ***             |               | ###            | ***              |              |              |
| overweight              | 40.42           | 34.04         | 36.53          | 41.41            | 37.28        | 38.88        |
| obesity                 | 21.71           | 14.04         | 17.03          | 28.45            | 17.92        | 22.02        |
| BF (%)                  | 22.54±5.77***   | 32.95±6.18    | 28.90±7.88###  | 23.86±5.72***    | 33.98±6.40   | 30.05±7.88   |
| SBP(mmHg)               | 127.40±14.96*** | 119.07±17.14  | 122.31±16.82   | 129.4±16.05***   | 118.22±17.65 | 122.57±17.89 |
| DBP(mmHg)               | 80.21±10.52***  | 75.42±10.66   | 77.28±10.86    | 82.2±11.89***    | 75.67±11.96  | 78.21±12.34  |
| FPG(mmol/L)             | 5.53±1.49***    | 5.22±1.08     | 5.34±1.27      | 5.56±1.48***     | 5.14±1.09    | 5.30±1.27    |
| TC(mmol/L)              | 4.86±1.00*      | 4.76±1.04     | 4.80±1.03###   | 5.10±0.97***     | 4.89±1.03    | 4.98±1.02    |
| TG(mmol/L)              | 2.18±1.89***    | 1.55±1.13     | 1.80±1.50##    | 2.00±1.46***     | 1.46±1.18    | 1.67±1.32    |
| LDL-C(mmol/L)           | 2.86±0.86       | 2.83±0.85     | 2.84±0.86###   | 3.13±0.87***     | 2.93±0.86    | 3.01±0.87    |
| HDL-C(mmol/L)           | 1.19±0.32***    | 1.39±0.34     | 1.31±0.34###   | 1.27±0.34***     | 1.45±0.37    | 1.38±0.37    |
| Hypertension (%)        | 33.74***        | 23.48         | 27.47#         | 40.28***         | 25.63        | 31.33        |
| Diabetes (%)            | 9.58***         | 5.53          | 7.11           | 9.86***          | 3.23         | 5.81         |
| Dyslipidemia (%)        | 51.11***        | 27.73         | 36.83          | 47.32***         | 26.34        | 34.5         |
| Risk factors ≥ 2(%)     | 24.16***        | 12.2          | 16.85          | 27.32***         | 13.8         | 19.06        |

Values are means ± SD or %.

\* $P < 0.05$ , \*\* $P < 0.01$ , \*\*\* $P < 0.001$  compared with women within Han or Mongolian adults; # $P < 0.05$ , ## $P < 0.01$ , ### $P < 0.001$  compared with Mongolian adults (Student's t-tests for continuous variables; Chi-square tests for categorical variables).

BF (%), body fat percentage; SBP, systolic blood pressure; DBP, diastolic blood pressure; FPG, fasting plasma glucose;

TC, total cholesterol; TG, triglycerides; LDL-C, low-density lipoprotein-cholesterol; HDL-C, high-density lipoprotein-cholesterol.



**Table 2.** Area under receiver operating characteristic (ROC) curves of BF% screening CVD risk factors

|                  | Hypertension         | Diabetes             | Dyslipidemia         | Risk factors $\geq$ 2 |
|------------------|----------------------|----------------------|----------------------|-----------------------|
| <b>Han</b>       |                      |                      |                      |                       |
| Men              |                      |                      |                      |                       |
| All ages         | 0.696(0.661,0.732)   | 0.589(0.531,0.648)   | 0.682(0.647,0.717)   | 0.699(0.662,0.736)    |
| 20-49 years      | 0.734(0.686,0.782)   | 0.532(0.417,0.646)   | 0.700(0.655,0.745)   | 0.731(0.681,0.780)    |
| 50-80 years      | 0.666(0.611,0.720)   | 0.606(0.536,0.676)   | 0.661(0.607,0.716)   | 0.670(0.613,0.726)    |
| Women            |                      |                      |                      |                       |
| All ages         | 0.737(0.707,0.767)   | 0.728(0.676,0.780) * | 0.711(0.683,0.740)   | 0.763(0.729,0.797) *  |
| 20-49 years      | 0.761(0.718,0.805)   | 0.787(0.700,0.874)   | 0.735(0.698,0.773)   | 0.836(0.788,0.885)    |
| 50-80 years      | 0.645(0.595,0.695) # | 0.617(0.544,0.689) # | 0.596(0.545,0.646) # | 0.644(0.590,0.698) #  |
| <b>Mongolian</b> |                      |                      |                      |                       |
| Men              |                      |                      |                      |                       |
| All ages         | 0.702(0.648,0.757)   | 0.686(0.609,0.764)   | 0.690(0.636,0.745)   | 0.736(0.683,0.789)    |
| 20-49 years      | 0.714(0.636,0.793)   | 0.765(0.646,0.884)   | 0.681(0.608,0.753)   | 0.764(0.688,0.839)    |
| 50-80 years      | 0.665(0.577,0.754)   | 0.609(0.498,0.720)   | 0.689(0.604,0.775)   | 0.689(0.606,0.772)    |
| Women            |                      |                      |                      |                       |
| All ages         | 0.733(0.685,0.780)   | 0.733(0.601,0.865)   | 0.685(0.637,0.733)   | 0.783(0.730,0.835)    |
| 20-49 years      | 0.643(0.557,0.729)   | 0.729(0.616,0.842)   | 0.670(0.604,0.735)   | 0.764(0.666,0.863)    |
| 50-80 years      | 0.683(0.604,0.763)   | 0.664(0.481,0.848)   | 0.586(0.502,0.671)   | 0.690(0.607,0.773)    |

\* $P < 0.05$ , Compared to men.# $P < 0.05$ , Compared to 20-49 years.

**Table 3.** Optimal cut-off values of BF% and their sensitivities, specificities, and Youden's index for CVD risk factors by age groups and sex

|                  | Hypertension |      |      |      | Diabetes |       |      |      | Dyslipidemia |      |      |      | Risk factors $\geq$ 2 |      |      |      |
|------------------|--------------|------|------|------|----------|-------|------|------|--------------|------|------|------|-----------------------|------|------|------|
|                  | Cutoff       | Sen  | Spe  | YI   | Cutoff   | Sen   | Spe  | YI   | Cutoff       | Sen  | Spe  | YI   | Cutoff                | Sen  | Spe  | YI   |
| <b>Han</b>       |              |      |      |      |          |       |      |      |              |      |      |      |                       |      |      |      |
| Men              |              |      |      |      |          |       |      |      |              |      |      |      |                       |      |      |      |
| All ages         | 24.2         | 62.7 | 70.3 | 33.0 | 18.7     | 94.2  | 23.5 | 17.7 | 21.6         | 77.3 | 52.4 | 29.7 | 24.2                  | 64.5 | 66.7 | 31.2 |
| 20-49 years      | 24.2         | 69.3 | 71.1 | 40.4 | 18.8     | 92.3  | 24.6 | 17.0 | 21.6         | 75.8 | 56.0 | 31.9 | 24.2                  | 68.4 | 67.8 | 36.3 |
| 50-80 years      | 24.2         | 58.0 | 68.7 | 26.6 | 22.5     | 75.0  | 45.1 | 20.1 | 20.5         | 87.1 | 41.9 | 29.0 | 25.0                  | 54.9 | 71.8 | 26.7 |
| Women            |              |      |      |      |          |       |      |      |              |      |      |      |                       |      |      |      |
| All ages         | 34.2         | 71.9 | 64.8 | 36.7 | 35.4     | 69.2  | 67.5 | 36.7 | 32.7         | 77.2 | 55.8 | 33.1 | 33.7                  | 83.1 | 58.1 | 41.2 |
| 20-49 years      | 33.6         | 73.7 | 67.2 | 40.9 | 32.0     | 94.4  | 52.6 | 47.1 | 33.9         | 66.1 | 70.3 | 36.5 | 33.9                  | 90.5 | 65.6 | 56.1 |
| 50-80 years      | 36.8         | 52.6 | 70.7 | 23.2 | 35.4     | 70.0  | 51.2 | 21.2 | 34.8         | 66.8 | 50.6 | 17.4 | 36.7                  | 56.9 | 65.5 | 22.4 |
| <b>Mongolian</b> |              |      |      |      |          |       |      |      |              |      |      |      |                       |      |      |      |
| Men              |              |      |      |      |          |       |      |      |              |      |      |      |                       |      |      |      |
| All ages         | 23.0         | 84.6 | 48.1 | 32.7 | 21.9     | 97.1  | 33.4 | 30.6 | 21.0         | 89.3 | 41.7 | 31.0 | 24.6                  | 77.3 | 60.1 | 37.4 |
| 20-49 years      | 23.0         | 87.3 | 51.3 | 38.6 | 26.8     | 75.0  | 75.1 | 50.1 | 18.5         | 94.5 | 35.1 | 29.6 | 25.7                  | 72.2 | 71.6 | 43.8 |
| 50-80 years      | 21.9         | 88.6 | 40.3 | 29.0 | 22.0     | 95.7  | 28.3 | 24.0 | 21.0         | 94.8 | 38.4 | 33.2 | 21.9                  | 96.7 | 37.1 | 33.8 |
| Women            |              |      |      |      |          |       |      |      |              |      |      |      |                       |      |      |      |
| All ages         | 35.7         | 71.3 | 66.3 | 37.6 | 40.0     | 55.6  | 84.6 | 40.2 | 36.4         | 62.6 | 68.6 | 31.2 | 36.4                  | 80.5 | 66.9 | 47.5 |
| 20-49 years      | 35.7         | 55.6 | 70.7 | 26.3 | 34.8     | 100.0 | 61.8 | 61.8 | 31.1         | 82.9 | 43.5 | 26.3 | 36.4                  | 70.0 | 74.1 | 44.1 |
| 50-80 years      | 36.7         | 73.5 | 54.5 | 28.0 | 41.0     | 60.0  | 81.3 | 41.3 | 36.5         | 77.9 | 46.9 | 24.9 | 36.6                  | 84.2 | 46.6 | 30.8 |

Sen, sensitivity; Spe, specificity; YI, Youden's index.

**Table 4.** Sensitivity, specificity and Youden's index for BF% to detect CVD risk factors by sex-specific cut-offs in Han adults

|       | Hypertension |      |      | Diabetes |      |      | Dyslipidemia |      |      | Risk factors $\geq$ 2 |      |      |
|-------|--------------|------|------|----------|------|------|--------------|------|------|-----------------------|------|------|
|       | Sen          | Spe  | YI   | Sen      | Spe  | YI   | Sen          | Spe  | YI   | Sen                   | Spe  | YI   |
| Men   |              |      |      |          |      |      |              |      |      |                       |      |      |
| 21    | 83.8         | 41.3 | 25.2 | 79.1     | 34.1 | 13.2 | 81.1         | 47.4 | 28.4 | 88.0                  | 39.5 | 27.5 |
| 22    | 77.6         | 49.4 | 27.0 | 70.9     | 41.5 | 12.4 | 73.4         | 54.7 | 28.1 | 81.1                  | 47.1 | 28.3 |
| 23    | 69.6         | 59.2 | 28.8 | 61.6     | 50.6 | 12.3 | 63.8         | 63.3 | 27.2 | 72.4                  | 56.4 | 28.7 |
| 24    | 64.0         | 67.1 | 31.1 | 53.5     | 57.6 | 11.1 | 56.0         | 69.7 | 25.7 | 66.4                  | 63.9 | 30.2 |
| 25    | 52.5         | 74.5 | 26.9 | 44.2     | 66.4 | 10.6 | 45.3         | 76.5 | 21.9 | 55.8                  | 72.1 | 27.9 |
| 26    | 43.9         | 81.3 | 25.2 | 33.7     | 73.5 | 7.2  | 51.1         | 81.3 | 32.4 | 44.7                  | 78.4 | 23.1 |
| Women |              |      |      |          |      |      |              |      |      |                       |      |      |
| 32    | 84.0         | 50.5 | 34.5 | 89.7     | 44.3 | 34.0 | 80.3         | 51.1 | 31.4 | 91.3                  | 47.1 | 38.4 |
| 33    | 78.6         | 56.9 | 35.5 | 82.1     | 50.4 | 32.4 | 74.7         | 57.5 | 32.2 | 85.5                  | 53.3 | 38.8 |
| 34    | 72.2         | 63.2 | 35.4 | 75.6     | 56.7 | 32.3 | 68.3         | 63.8 | 32.1 | 79.7                  | 59.7 | 39.3 |
| 35    | 64.4         | 70.9 | 35.3 | 70.5     | 64.6 | 35.1 | 58.6         | 70.8 | 29.3 | 69.8                  | 67.1 | 36.9 |
| 36    | 55.6         | 77.3 | 32.9 | 62.8     | 71.5 | 34.3 | 48.3         | 76.5 | 24.8 | 61.1                  | 73.8 | 34.9 |
| 37    | 47.7         | 82.7 | 30.4 | 53.9     | 77.3 | 31.1 | 38.9         | 81.1 | 19.9 | 52.3                  | 79.4 | 31.7 |

Sen, sensitivity; Spe, specificity; YI, Youden's index.

**Table 5.** Sensitivity, specificity and Youden's index for BF% to detect CVD risk factors by sex-specific cut-offs in Mongolian adults

|       | Hypertension |      |      | Diabetes |      |      | Dyslipidemia |      |      | Risk factors $\geq$ 2 |      |      |
|-------|--------------|------|------|----------|------|------|--------------|------|------|-----------------------|------|------|
|       | Sen          | Spe  | YI   | Sen      | Spe  | YI   | Sen          | Spe  | YI   | Sen                   | Spe  | YI   |
| Men   |              |      |      |          |      |      |              |      |      |                       |      |      |
| 21    | 88.1         | 37.3 | 25.4 | 97.1     | 29.7 | 26.8 | 89.3         | 41.7 | 31.0 | 95.9                  | 35.7 | 31.5 |
| 22    | 86.7         | 43.4 | 30.1 | 94.3     | 34.1 | 28.4 | 82.7         | 43.9 | 26.6 | 93.8                  | 40.7 | 34.5 |
| 23    | 84.6         | 48.1 | 32.7 | 88.6     | 37.5 | 26.1 | 81.0         | 49.2 | 30.2 | 91.8                  | 45.0 | 36.7 |
| 24    | 72.7         | 54.7 | 27.5 | 82.9     | 46.6 | 29.4 | 69.1         | 55.1 | 24.1 | 79.4                  | 52.3 | 31.7 |
| 25    | 60.8         | 64.2 | 25.0 | 71.4     | 56.9 | 28.3 | 60.1         | 66.8 | 27.0 | 70.1                  | 63.2 | 33.3 |
| 26    | 53.2         | 72.2 | 25.3 | 60.0     | 64.4 | 24.4 | 49.4         | 72.2 | 21.6 | 60.8                  | 70.5 | 31.4 |
| Women |              |      |      |          |      |      |              |      |      |                       |      |      |
| 32    | 84.6         | 42.9 | 27.5 | 83.3     | 36.5 | 19.8 | 81.6         | 42.1 | 23.7 | 92.2                  | 40.3 | 32.5 |
| 33    | 79.7         | 48.9 | 28.6 | 83.3     | 42.4 | 25.7 | 76.9         | 48.2 | 25.1 | 88.3                  | 46.4 | 34.7 |
| 34    | 75.5         | 54.7 | 30.2 | 83.3     | 48.0 | 31.3 | 73.5         | 54.3 | 27.7 | 85.7                  | 52.2 | 37.9 |
| 35    | 73.4         | 62.2 | 35.6 | 77.8     | 54.1 | 31.9 | 68.7         | 60.8 | 29.5 | 84.4                  | 59.0 | 43.5 |
| 36    | 68.5         | 67.0 | 35.5 | 66.7     | 58.7 | 25.4 | 63.3         | 65.5 | 28.7 | 80.5                  | 64.0 | 44.6 |
| 37    | 58.7         | 73.5 | 32.2 | 61.1     | 66.1 | 27.2 | 55.1         | 72.5 | 27.6 | 70.1                  | 70.9 | 41.0 |

Sen, sensitivity; Spe, specificity; YI, Youden's index.

**Table 6.** Age-adjusted OR(95%CI) and PARP of each CVD risk factor by sex-specific cut-offs for BF% in Han and Mongolian adults

|                       | <i>OR*</i> | <i>95%CI</i> | <i>PARP(%)</i> |
|-----------------------|------------|--------------|----------------|
| <b>Han</b>            |            |              |                |
| Men(BF% $\geq$ 24%)   |            |              |                |
| Hypertension          | 3.680      | 2.728-4.964  | 53.8           |
| Diabetes              | 1.479      | 0.940-2.328  | 17.2           |
| Dyslipidemia          | 2.966      | 2.251-3.908  | 46.1           |
| Risk factors $\geq$ 2 | 3.450      | 2.490-4.780  | 51.6           |
| Women(BF% $\geq$ 34%) |            |              |                |
| Hypertension          | 3.382      | 2.544-4.494  | 51.8           |
| Diabetes              | 2.660      | 1.539-4.596  | 42.8           |
| Dyslipidemia          | 3.152      | 2.439-4.072  | 49.3           |
| Risk factors $\geq$ 2 | 4.016      | 2.682-6.014  | 57.6           |
| <b>Mongolian</b>      |            |              |                |
| Men(BF% $\geq$ 25%)   |            |              |                |
| Hypertension          | 2.587      | 1.635-4.094  | 42.2           |
| Diabetes              | 2.982      | 1.374-6.471  | 47.6           |
| Dyslipidemia          | 2.986      | 1.930-4.620  | 47.7           |
| Risk factors $\geq$ 2 | 3.772      | 2.251-6.321  | 56.0           |
| Women(BF% $\geq$ 35%) |            |              |                |
| Hypertension          | 2.851      | 1.796-4.526  | 46.5           |
| Diabetes              | 2.061      | 0.634-6.697  | 33.3           |
| Dyslipidemia          | 2.599      | 1.704-3.964  | 42.9           |
| Risk factors $\geq$ 2 | 4.882      | 2.497-9.545  | 64.6           |

\*Adjusted odds ratios for cardiovascular risk factors in subjects using sex-specific cut-offs for BF%, adjusted for age.

OR, odds ratios; PARP, population attributable risk proportion.

**Figure 1.** ROC curves for BF% screening CVD risk factors in men and women among Han and Mongolian adults.

1  
2  
3  
4  
5  
6  
7  
8  
9  
10  
11  
12  
13  
14  
15  
16  
17  
18  
19  
20  
21  
22  
23  
24  
25  
26  
27  
28  
29  
30  
31  
32  
33  
34  
35  
36  
37  
38  
39  
40  
41  
42  
43  
44  
45  
46  
47  
48  
49  
50  
51  
52  
53  
54  
55  
56  
57  
58  
59  
60

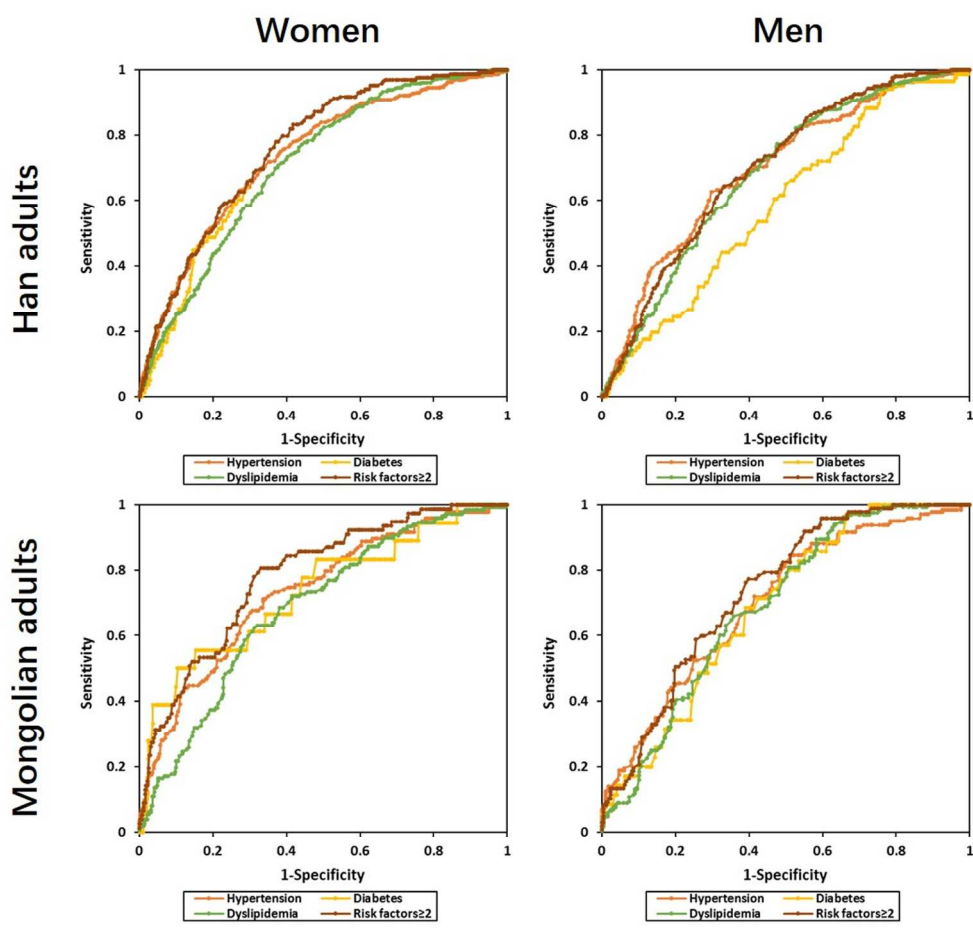

Figure 1 ROC curves for BF% screening CVD risk factors.  
Optimal body fat percentage cu  
283x267mm (300 x 300 DPI)

only

## STROBE Statement—checklist of items that should be included in reports of observational studies

|                          | Item No | Recommendation                                                                                                                                                                                                                                                                                                                                                                                                                                                         | Page No |
|--------------------------|---------|------------------------------------------------------------------------------------------------------------------------------------------------------------------------------------------------------------------------------------------------------------------------------------------------------------------------------------------------------------------------------------------------------------------------------------------------------------------------|---------|
| Title and abstract       | 1       | (a) Indicate the study's design with a commonly used term in the title or the abstract                                                                                                                                                                                                                                                                                                                                                                                 | 1-2     |
|                          |         | (b) Provide in the abstract an informative and balanced summary of what was done and what was found                                                                                                                                                                                                                                                                                                                                                                    | 2       |
| <b>Introduction</b>      |         |                                                                                                                                                                                                                                                                                                                                                                                                                                                                        |         |
| Background/rationale     | 2       | Explain the scientific background and rationale for the investigation being reported                                                                                                                                                                                                                                                                                                                                                                                   | 3       |
| Objectives               | 3       | State specific objectives, including any prespecified hypotheses                                                                                                                                                                                                                                                                                                                                                                                                       | 3       |
| <b>Methods</b>           |         |                                                                                                                                                                                                                                                                                                                                                                                                                                                                        |         |
| Study design             | 4       | Present key elements of study design early in the paper                                                                                                                                                                                                                                                                                                                                                                                                                | 3-4     |
| Setting                  | 5       | Describe the setting, locations, and relevant dates, including periods of recruitment, exposure, follow-up, and data collection                                                                                                                                                                                                                                                                                                                                        | 3-4     |
| Participants             | 6       | (a) <i>Cohort study</i> —Give the eligibility criteria, and the sources and methods of selection of participants. Describe methods of follow-up<br><i>Case-control study</i> —Give the eligibility criteria, and the sources and methods of case ascertainment and control selection. Give the rationale for the choice of cases and controls<br><i>Cross-sectional study</i> —Give the eligibility criteria, and the sources and methods of selection of participants | 3-4     |
|                          |         | (b) <i>Cohort study</i> —For matched studies, give matching criteria and number of exposed and unexposed<br><i>Case-control study</i> —For matched studies, give matching criteria and the number of controls per case                                                                                                                                                                                                                                                 |         |
| Variables                | 7       | Clearly define all outcomes, exposures, predictors, potential confounders, and effect modifiers. Give diagnostic criteria, if applicable                                                                                                                                                                                                                                                                                                                               | 4       |
| Data sources/measurement | 8*      | For each variable of interest, give sources of data and details of methods of assessment (measurement). Describe comparability of assessment methods if there is more than one group                                                                                                                                                                                                                                                                                   | 4       |
| Bias                     | 9       | Describe any efforts to address potential sources of bias                                                                                                                                                                                                                                                                                                                                                                                                              | 4       |
| Study size               | 10      | Explain how the study size was arrived at                                                                                                                                                                                                                                                                                                                                                                                                                              | 4       |
| Quantitative variables   | 11      | Explain how quantitative variables were handled in the analyses. If applicable, describe which groupings were chosen and why                                                                                                                                                                                                                                                                                                                                           | 4       |
| Statistical methods      | 12      | (a) Describe all statistical methods, including those used to control for confounding                                                                                                                                                                                                                                                                                                                                                                                  | 4-5     |
|                          |         | (b) Describe any methods used to examine subgroups and interactions                                                                                                                                                                                                                                                                                                                                                                                                    | 4-5     |
|                          |         | (c) Explain how missing data were addressed                                                                                                                                                                                                                                                                                                                                                                                                                            |         |
|                          |         | (d) <i>Cohort study</i> —If applicable, explain how loss to follow-up was addressed<br><i>Case-control study</i> —If applicable, explain how matching of cases and controls was addressed<br><i>Cross-sectional study</i> —If applicable, describe analytical methods taking account of sampling strategy                                                                                                                                                              |         |
|                          |         | (e) Describe any sensitivity analyses                                                                                                                                                                                                                                                                                                                                                                                                                                  |         |

| Results                  |     |                                                                                                                                                                                                              | Page No |
|--------------------------|-----|--------------------------------------------------------------------------------------------------------------------------------------------------------------------------------------------------------------|---------|
| Participants             | 13* | (a) Report numbers of individuals at each stage of study—eg numbers potentially eligible, examined for eligibility, confirmed eligible, included in the study, completing follow-up, and analysed            | 3,5     |
|                          |     | (b) Give reasons for non-participation at each stage                                                                                                                                                         | 3,5     |
|                          |     | (c) Consider use of a flow diagram                                                                                                                                                                           |         |
| Descriptive data         | 14* | (a) Give characteristics of study participants (eg demographic, clinical, social) and information on exposures and potential confounders                                                                     | 5       |
|                          |     | (b) Indicate number of participants with missing data for each variable of interest                                                                                                                          |         |
|                          |     | (c) <i>Cohort study</i> —Summarise follow-up time (eg, average and total amount)                                                                                                                             |         |
| Outcome data             | 15* | <i>Cohort study</i> —Report numbers of outcome events or summary measures over time                                                                                                                          |         |
|                          |     | <i>Case-control study</i> —Report numbers in each exposure category, or summary measures of exposure                                                                                                         |         |
|                          |     | <i>Cross-sectional study</i> —Report numbers of outcome events or summary measures                                                                                                                           | 5-10    |
| Main results             | 16  | (a) Give unadjusted estimates and, if applicable, confounder-adjusted estimates and their precision (eg, 95% confidence interval). Make clear which confounders were adjusted for and why they were included | 10-11   |
|                          |     | (b) Report category boundaries when continuous variables were categorized                                                                                                                                    |         |
|                          |     | (c) If relevant, consider translating estimates of relative risk into absolute risk for a meaningful time period                                                                                             |         |
| Other analyses           | 17  | Report other analyses done—eg analyses of subgroups and interactions, and sensitivity analyses                                                                                                               |         |
| <b>Discussion</b>        |     |                                                                                                                                                                                                              |         |
| Key results              | 18  | Summarise key results with reference to study objectives                                                                                                                                                     | 11      |
| Limitations              | 19  | Discuss limitations of the study, taking into account sources of potential bias or imprecision. Discuss both direction and magnitude of any potential bias                                                   | 2       |
| Interpretation           | 20  | Give a cautious overall interpretation of results considering objectives, limitations, multiplicity of analyses, results from similar studies, and other relevant evidence                                   | 11-12   |
| Generalisability         | 21  | Discuss the generalisability (external validity) of the study results                                                                                                                                        | 12      |
| <b>Other information</b> |     |                                                                                                                                                                                                              |         |
| Funding                  | 22  | Give the source of funding and the role of the funders for the present study and, if applicable, for the original study on which the present article is based                                                | 13      |

\*Give information separately for cases and controls in case-control studies and, if applicable, for exposed and unexposed groups in cohort and cross-sectional studies.

**Note:** An Explanation and Elaboration article discusses each checklist item and gives methodological background and published examples of transparent reporting. The STROBE checklist is best used in conjunction with this article (freely available on the Web sites of PLoS Medicine at <http://www.plosmedicine.org/>, Annals of Internal Medicine at <http://www.annals.org/>, and Epidemiology at <http://www.epidem.com/>). Information on the STROBE Initiative is available at [www.strobe-statement.org](http://www.strobe-statement.org).

# BMJ Open

## Optimal body fat percentage cut-off values for identifying cardiovascular risk factors in Mongolian and Han adults: A Population-based Cross-Sectional Study in Inner Mongolia, China



|                                 |                                                                                                                                                                                                                                                                                                                                                                                                                                                                                                                                                                                                                                                                                                                                                                                                                                                                                                                                                                                                                                                                                                                                                                                                                                                                                                                                                                                                                                                                                                                                                                                                                                                                                                                                                                                                                                                                                                                                                                |
|---------------------------------|----------------------------------------------------------------------------------------------------------------------------------------------------------------------------------------------------------------------------------------------------------------------------------------------------------------------------------------------------------------------------------------------------------------------------------------------------------------------------------------------------------------------------------------------------------------------------------------------------------------------------------------------------------------------------------------------------------------------------------------------------------------------------------------------------------------------------------------------------------------------------------------------------------------------------------------------------------------------------------------------------------------------------------------------------------------------------------------------------------------------------------------------------------------------------------------------------------------------------------------------------------------------------------------------------------------------------------------------------------------------------------------------------------------------------------------------------------------------------------------------------------------------------------------------------------------------------------------------------------------------------------------------------------------------------------------------------------------------------------------------------------------------------------------------------------------------------------------------------------------------------------------------------------------------------------------------------------------|
| Journal:                        | <i>BMJ Open</i>                                                                                                                                                                                                                                                                                                                                                                                                                                                                                                                                                                                                                                                                                                                                                                                                                                                                                                                                                                                                                                                                                                                                                                                                                                                                                                                                                                                                                                                                                                                                                                                                                                                                                                                                                                                                                                                                                                                                                |
| Manuscript ID                   | bmjopen-2016-014675.R2                                                                                                                                                                                                                                                                                                                                                                                                                                                                                                                                                                                                                                                                                                                                                                                                                                                                                                                                                                                                                                                                                                                                                                                                                                                                                                                                                                                                                                                                                                                                                                                                                                                                                                                                                                                                                                                                                                                                         |
| Article Type:                   | Research                                                                                                                                                                                                                                                                                                                                                                                                                                                                                                                                                                                                                                                                                                                                                                                                                                                                                                                                                                                                                                                                                                                                                                                                                                                                                                                                                                                                                                                                                                                                                                                                                                                                                                                                                                                                                                                                                                                                                       |
| Date Submitted by the Author:   | 09-Mar-2017                                                                                                                                                                                                                                                                                                                                                                                                                                                                                                                                                                                                                                                                                                                                                                                                                                                                                                                                                                                                                                                                                                                                                                                                                                                                                                                                                                                                                                                                                                                                                                                                                                                                                                                                                                                                                                                                                                                                                    |
| Complete List of Authors:       | <p>Li, Yanlong; Institute of Basic Medical Sciences, Chinese Academy of Medical Sciences, Department of Epidemiology and Statistics; School of Basic Medicine, Peking Union Medical College, Department of Epidemiology and Statistics</p> <p>Wang, Hailing; Inner Mongolia Center for Disease Control and Prevention</p> <p>Wang, Ke; Sichuan University West China Second University Hospital, National Office for Maternal and Child Health Surveillance of China, Department of Obstetrics, Key Laboratory of Birth Defects and Related Diseases of Women and Children (Sichuan University), Ministry of Education</p> <p>Wang, Wenrui; Inner Mongolia Center for Disease Control and Prevention</p> <p>Dong, Fen; China-Japan Friendship Hospital</p> <p>Qian, Yonggang; Inner Mongolia Center for Disease Control and Prevention</p> <p>Gong, Haiying; Fangshan District Center for Disease Control and Prevention</p> <p>Xu, Guodong; China-Japan Friendship Hospital</p> <p>Li, Guoju; Institute of Basic Medical Sciences, Chinese Academy of Medical Sciences,, Department of Epidemiology and Statistics; School of Basic Medicine, Peking Union Medical College, Department of Epidemiology and Statistics</p> <p>Pan, Li; Institute of Basic Medical Sciences, Chinese Academy of Medical Sciences, Department of Epidemiology and Statistics; School of Basic Medicine, Peking Union Medical College, Department of Epidemiology and Statistics</p> <p>Zhu, Guangjin; Institute of Basic Medical Sciences, Chinese Academy of Medical Sciences, Department of Epidemiology and Statistics; School of Basic Medicine, Peking Union Medical College, Department of Epidemiology and Statistics</p> <p>shan, guangliang; Institute of Basic Medical Sciences, Chinese Academy of Medical Sciences, Department of Epidemiology and Statistics; School of Basic Medicine, Peking Union Medical College, Department of Epidemiology and Statistics</p> |
| <b>Primary Subject Heading</b>: | Epidemiology                                                                                                                                                                                                                                                                                                                                                                                                                                                                                                                                                                                                                                                                                                                                                                                                                                                                                                                                                                                                                                                                                                                                                                                                                                                                                                                                                                                                                                                                                                                                                                                                                                                                                                                                                                                                                                                                                                                                                   |
| Secondary Subject Heading:      | Public health                                                                                                                                                                                                                                                                                                                                                                                                                                                                                                                                                                                                                                                                                                                                                                                                                                                                                                                                                                                                                                                                                                                                                                                                                                                                                                                                                                                                                                                                                                                                                                                                                                                                                                                                                                                                                                                                                                                                                  |
| Keywords:                       | body composition, obesity, cardiovascular risk factors                                                                                                                                                                                                                                                                                                                                                                                                                                                                                                                                                                                                                                                                                                                                                                                                                                                                                                                                                                                                                                                                                                                                                                                                                                                                                                                                                                                                                                                                                                                                                                                                                                                                                                                                                                                                                                                                                                         |



1  
2  
3  
4  
5  
6  
7  
8  
9  
10  
11  
12  
13  
14  
15  
16  
17  
18  
19  
20  
21  
22  
23  
24  
25  
26  
27  
28  
29  
30  
31  
32  
33  
34  
35  
36  
37  
38  
39  
40  
41  
42  
43  
44  
45  
46  
47  
48  
49  
50  
51  
52  
53  
54  
55  
56  
57  
58  
59  
60



SCHOLARONE™  
Manuscripts

For peer review only

1  
2  
3 **Optimal body fat percentage cut-off values for identifying cardiovascular risk factors in**  
4 **Mongolian and Han adults: A Population-based Cross-Sectional Study in Inner Mongolia,**  
5 **China**  
6

7 Yanlong Li<sup>1</sup>, Hailing Wang<sup>2</sup>, Ke Wang<sup>3</sup>, Wenrui Wang<sup>2</sup>, Fen Dong<sup>4</sup>, Yonggang Qian<sup>2</sup>, Haiying  
8 Gong<sup>5</sup>, Guodong Xu<sup>4</sup>, Guoju Li<sup>1</sup>, Li Pan<sup>1</sup>, Guangjin Zhu<sup>1</sup>, Guangliang Shan<sup>1</sup>  
9

10 <sup>1</sup> Department of Epidemiology and Statistics, Institute of Basic Medical Sciences, Chinese  
11 Academy of Medical Sciences, School of Basic Medicine, Peking Union Medical College,  
12 Beijing, China  
13

14 <sup>2</sup> Inner Mongolia Center for Disease Control and Prevention, Hohhot, China

15 <sup>3</sup> National Office for Maternal and Child Health Surveillance of China, Department of Obstetrics,  
16 Key Laboratory of Birth Defects and Related Diseases of Women and Children (Sichuan  
17 University), Ministry of Education, West China Second University Hospital, Sichuan University,  
18 Chengdu, China.  
19

20 <sup>4</sup> China-Japan Friendship Hospital, Beijing, China

21 <sup>5</sup> Fangshan District Center for Disease Control and Prevention, Beijing, China  
22

23 **Keywords:** body composition, obesity, cardiovascular risk factors  
24

25 **Running Title:** Optimal BF% cut-offs in Chinese  
26

27 **Corresponding Author:**  
28

29 Guangliang Shan  
30

31 Department of Epidemiology and Statistics, Institute of Basic Medical Sciences, Chinese  
32 Academy of Medical Sciences, School of Basic Medicine, Peking Union Medical College,  
33 Beijing 100005, China  
34

35 [Guangliang\\_shan@163.com](mailto:Guangliang_shan@163.com)  
36

37 **Word Count:** 2675 words  
38

39 **Tables:** 6  
40

41 **Figures:** 1  
42

43 **Supplementary Files:** 0  
44  
45  
46  
47  
48  
49  
50  
51  
52  
53  
54  
55  
56  
57  
58  
59  
60

## Abstract

**Objective:** The present study was designed to determine the optimal cut-off values of body fat percentage (BF%) for the detection of cardiovascular disease (CVD) risk factors in Mongolian and Han adults. **Method:** This cross-sectional study involving 3221 Chinese adults (2308 Han and 913 Mongolian) aged 20-80 years was conducted in Inner Mongolia Autonomous region, China, in 2014. Data from a standardized questionnaire, physical examination, and blood sample were obtained. The BF% was estimated using bioelectrical impedance analysis. Optimal BF% cut-offs were analyzed by receiver operating characteristic (ROC) curves to predict the risk of diabetes, hypertension, dyslipidemia. Binary logistic regression analysis was performed to evaluate the odds ratio (OR) of each CVD risk factor according to obesity defined by BF%.

**Results:** Mean BF% levels were lower in men than in women (22.54±5.77 vs 32.95±6.18 in Han, 23.86±5.72 vs 33.98±6.40 in Mongolian, respectively;  $P<0.001$ ). In Han population, the area under curve (AUC) values for BF% ranged from 0.589 to 0.699 for men and from 0.711 to 0.763 for women. Compared with men, AUCs for diabetes and clustering of  $\geq 2$  risk factors in women were significantly higher ( $P<0.05$ ). The AUCs for BF% in women (0.685-0.783) were similar with those in men (0.686-0.736) for CVD risk factors in Mongolian. In Han adults, the optimal BF% cut-off values to detect CVD risk factors varied from 18.7% to 24.2% in men, and 32.7% to 35.4% in women. In Mongolian population, the optimal cut-off values of BF% for men and women ranged from 21.0% to 24.6% and from 35.7% to 40.0%, respectively. Subjects with high BF% ( $\geq 24\%$  in men,  $\geq 34\%$  in women) had higher risk of CVD risk factors in Han (age-adjusted ORs from 1.479 to 3.680, 2.660 to 4.016, respectively). In Mongolian, adults with high BF% ( $\geq 25\%$  in men,  $\geq 35\%$  in women) had higher risk of CVD risk factors (age-adjusted ORs from 2.587 to 3.772, 2.061 to 4.882, respectively). **Conclusions:** The optimal BF% cut-offs for obesity for the prediction of CVD risk factors in Chinese men and women were approximately 24% and 34% for Han adults, and 25% and 35% for Mongolian population of Inner Mongolia, China, respectively.

## Strengths and limitations of this study

The present study was first designed to determine the optimal cut-off values of BF% for CVD risk factors (hypertension, diabetes, dyslipidemia) and clustering of  $\geq 2$  these risk factors in Chinese population.

This study used a large sample covering most age groups to estimate BF% cut-off values for discriminating CVD risk factors in both sexes, especially in different ethnics (Han and Mongolian) in China.

The prevention of public health problems was evaluated by PARP of BF% cut-offs in sexes and races.

The study characterizes the optimal body fat percentage cut-off values for identifying CVD risk factors in a cross-sectional setting using the occurrence of established CVD risk factors as a proxy risk estimate. Lots of epidemic studies, especially prospective cohort studies, need to be completed to improve cutoff points accuracy of BF% in China.

BF% in this study was measured using bioelectrical impedance analysis, which tends to underestimate body fat in all subjects and in men and women separately. However, considering

1  
2  
3 the convenience and inexpensiveness of BIA, large-scale epidemiological investigations  
4 appropriately use this analysis.  
5

## 6 **Introduction**

7  
8 During the past four decades, the global prevalence of overweight and obesity has risen  
9 dramatically and is now estimated to affect over 600 million people[1]. In China, the prevalence  
10 of obesity approximately tripled from 3.75% in 1991 to 11.3% in 2011 according to diagnostic  
11 criteria of the Working Group on Obesity[2]. It is now identified that obesity essentially increases  
12 the risk of hypertension, diabetes and dyslipidemia, which has a great influence on the morbidity  
13 and mortality of Cardiovascular disease (CVD)[3].  
14

15  
16 Body mass index(BMI) closely correlated with body fatness is recommended by WHO as a  
17 population-level measure of overweight and obesity (BMI $\geq$ 30 or 25 kg/m<sup>2</sup> is defined as obese or  
18 overweight, respectively). However, it may not consistently characterize adiposity across  
19 racial/ethnic groups[4]. Body fat percentage (BF%) as a percentage of total bodyweight has  
20 advantages over BMI in estimating fat mass[5]. The BF% cut-off points for obesity proposed by  
21 the WHO are 25% for men and 35% for women, corresponding a BMI of 30 kg/m<sup>2</sup> in young  
22 Caucasians[6]. It was reported that BMI and percentage of body fat differ across populations[7].  
23 The Chinese tend to have a lower BMI but a higher fat volume. Li and colleagues[8] showed that  
24 the BF% cut-off values for Chinese adults were similar to those proposed by the WHO. However,  
25 a longitudinal epidemiological study[9] reflected that the present Chinese BMI criteria (28 kg/m<sup>2</sup>  
26 for obesity) was relatively inconsistent with WHO BF% criteria in determining obesity. Therefore,  
27 the appropriate BF% cut-off points for Chinese remains inconclusive and needs to be further  
28 studied. Inner Mongolia Autonomous Region located in northern China consists mainly of Han  
29 and Mongolian. Compared with Han population, the dietary pattern of Mongolians tends to be  
30 traditionally rich in whole milk, fats and oils, which might increase greater risk of obesity in  
31 Mongolia [10]. In this study, we aimed to characterize the optimal BF% cut-off points in  
32 Mongolian and Han adults according to its risk for common CVD risk factors, including diabetes,  
33 hypertension and dyslipidemia.  
34  
35  
36

## 37 **Methods**

### 38 **Study population**

39  
40 The present study was based on data from the China National Health Survey (CNHS) in Inner  
41 Mongolia Autonomous region in 2014, which has already been described in detail elsewhere[11].  
42 A total of 3508 examinees aged 20-80 years were found to be eligible for the study. We excluded  
43 individuals with incomplete data for hypertension, diabetes and dyslipidemia status, sex, age and  
44 the anthropometric indices (i.e., BMI, BF%). In addition, pregnant women were excluded. This  
45 resulted in a final analytical sample of 3221 adults (2308 Han and 913 Mongolian).  
46  
47  
48

49 Written informed consent was acquired from each participant before data collection. The study  
50 was approved by the Institutional Review Board of the Institute of Basic Medical Sciences,  
51 Chinese Academy of Medical Sciences.  
52

### 53 **Data collection**

54  
55 A standardized health questionnaire was completed by investigators and contained demographic  
56 information, diseases (particularly hypertension, diabetes) and the family history of diabetes,  
57 cardiovascular disease, or cancer. Anthropometric measurements including height, weight, and  
58  
59

body fat percentage were taken with the subjects after an overnight fast and wearing light clothes and without shoes in the morning. Height was measured to the nearest 0.1cm using a fixed stadiometer. Body weight was measured in an upright position to the nearest 0.1kg. Body weight and body fat percentage was measured by bioelectrical impedance analysis (BIA), with a commercially available body analyzer (BC-420, TANITA, Japan). BMI was calculated as weight in kilograms divided by height in meters squared ( $\text{kg}/\text{m}^2$ ). Blood pressure was taken three times using the electronic sphygmomanometer (HEM-907, OMRON, Japan) and the average was used as the mean blood pressure. All surveys were performed by trained staff.

Blood samples were collected from all participants following an overnight fast. Serum total cholesterol (TC), triglycerides (TG), low-density lipoprotein-cholesterol (LDL-C), high-density lipoprotein-cholesterol (HDL-C), and fasting plasma glucose (FPG) were determined by General Hospital of Chinese PLA.

### Definition

Diabetes was defined as FPG  $\geq 7.0$ mmol/L and/or physician-diagnosed diabetes. Hypertension was defined as mean systolic blood pressure (SBP)  $\geq 140$ mmHg and/or mean diastolic blood pressure (DBP)  $\geq 90$ mmHg and/or physician-diagnosed hypertension. Dyslipidemia was defined as follow: TC  $\geq 6.22$ mmol/L and/or LDL-C  $\geq 4.14$ mmol/L and/or HDL-C  $< 1.04$ mmol/L and/or TG  $\geq 2.26$ mmol/L. Clustering of risk factors was defined as presence of  $\geq 2$  CVD risk factors. Overweight and obesity were defined as a subject with BMI  $\geq 25$  and  $< 30$   $\text{kg}/\text{m}^2$ , and BMI  $\geq 30$   $\text{kg}/\text{m}^2$  respectively,

### Statistical analysis

Statistical analysis was performed using SAS software (version 9.3; SAS Institute, Cary, NC, USA). Continuous variables were presented as mean  $\pm$  SD; comparisons between two groups were used by Student's t test. Categorical variables were expressed as percentages and compared by Chi-square test. Two-tailed *P*-value less than 0.05 was considered statistically significant.

Receive operating characteristic (ROC) curve analysis was performed to using BF% as continuous variable in logistic regression models to obtain accurate estimates of area under the curve (AUC) in relation to hypertension, diabetes, and dyslipidemia, which describe the probability that a test will correctly identify subjects with disease. The optimal cut-off values were defined as the points on the ROC curve where Youden's index (sensitivity+specificity-1) was the maximal. Odd ratios (ORs) and the corresponding 95% confidence interval (CI) were calculated by binary logistic regression analysis to measure the association between obesity defined by BF% and CVD risk factors. PARP (percent of prevalence of a condition/disease in the population due to presence of risk factor or percent of prevalence of a condition/disease in the population that would be reduced if risk factor was removed) for each CVD risk factor was calculated by sex-specific cut-offs for BF%. Formulas for calculation of PARP are given below.

$$PARP = 100 * P(OR-1) / [P(OR-1) + 1] \%$$

(*P*: percent of subjects whose BF% was above the sex-specific cut-off value; *OR*: age-adjusted odds ratios for cardiovascular risk factors in subjects using sex-specific cut-offs for BF%)

### Results

### Base characteristics of subjects

Baseline characteristics for men and women in Han and Mongolian adults are shown in Table 1. In Han adults, men had a higher mean BMI, SBP, DBP, FG, TC, TG, meanwhile a lower BF% and HDL-C than women. LDL-C were comparable between men and women ( $P>0.05$ ). The prevalence of hypertension, diabetes, and dyslipidemia were higher in men than in women. Similarly, in Mongolian adults, men had a higher mean BMI, SBP, DBP, FG, TC, TG, LDL-C whereas a lower BF% and HDL-C than women. The prevalence of CVD risk factors was higher in men than in women. In total, compared with Han population, Mongolian had a higher mean weight, BMI, BF%, TC, LDL-C, HDL-C but a lower TG. Moreover, the prevalence of obesity and hypertension was higher in Mongolian than in Han.

### Area under ROC and optimal cut-offs for predicting CVD risk factors

Figure 1 shows ROC curves of BF% for identifying CVD risk factors in men and women among Han and Mongolian adults. Area under ROC curves of BF% stratified by age groups are summarized in Table 2. In Han population, the AUC of BF% ranged from 0.589 to 0.699 for men and from 0.711 to 0.763 for women. Compared with men, AUCs for diabetes and clustering of  $\geq 2$  risk factors in women were significantly higher ( $P<0.05$ ). In addition, the AUC for CVD risk factors were larger in the younger age group than that in the older in women ( $P<0.05$ ). However, AUCs for cardiovascular risk factors were all comparable between men and women in Mongolian adults ( $P>0.05$ ). Among these, the AUCs of BF% ranged from 0.686 to 0.736 for men and from 0.685 to 0.783 for women. Although BF% performed differently for CVD risk factors in age groups of both sexes, there were no significant difference in the AUCs ( $P>0.05$ ).

Optimal cut-off points of BF% for CVD risk factors in both ethnic groups were given in Table 3, which were identified according to the highest Youden's index on ROC curves. In Han adults, the BF% cut-off values were found to optimally predict the risk of hypertension, diabetes and dyslipidemia varied from 18.7% to 24.2% in men, and 32.7% to 35.4% in women. In addition, the optimal cut-off points of BF% were all higher for women than for men in each CVD risk factor. In Mongolian, the optimal BF% cut-off values for men and women ranged from 21.0% to 24.6% and from 35.7% to 40.0%, respectively. The optimal BF% cut-offs between men and women in Mongolian adults were remarkably different. Basically, the optimal cut-off values of BF% in women were mostly higher for older age group than for the younger in Han and Mongolian adults. However, the optimal BF% cut-off points varied greatly by age and CVD risk factors.

The optimal cut-offs of BF% for identifying CVD risk factors in Han and Mongolian adults were also assessed. Table 4 and Table 5 show the sensitivity, specificity and Youden's index for the various cut-off values for BF% in men and women. Clearly, specificity gradually increased but sensitivity conversely decreased with the increase cut-off values of BF% in men and women. BF% cut-off points of preferable sensitivity and specificity to detect each CVD risk factor and clustering of  $\geq 2$  risk factors were selected as optimal values. In Han population, 24% and 34% were the optimal BF% cut-off values in terms of the Youden's index, sensitivity and specificity for men and women, respectively. In Mongolian, the optimal cut-off points of BF% were 25% for men and 35% for women.

The age-adjusted OR(95%CI) and PARP of each CVD risk factor using sex-specific cut-offs for BF% in Han and Mongolian adults are shown in Table 6. In Han adults, BF% corresponded to significantly higher OR for hypertension and dyslipidemia in men except diabetes, while BF%

1  
2  
3 corresponded to significantly higher OR for all CVD risk factors in women. In Mongolian  
4 population, BF% corresponded to significantly higher OR for all CVD risk factors in both sexes  
5 except diabetes in women. According to PARP analysis, the proportion of Han adults whose BF%  
6  $\geq 24\%$  was about 43% in men. If BF% were controlled below 24%, 53.8% of hypertension, 17.2%  
7 of diabetes, 46.1% of dyslipidemia, and 51.6% of clustering of  $\geq 2$  CVD risk factors would be  
8 prevented. Women whose BF%  $\geq 34\%$  was about 45% in Han women. If BF% were controlled  
9 under 24%, 57.6% of clustering of  $\geq 2$  risk factors would be prevented. In Mongolian, the  
10 proportions of subjects whose BF% above 25% for men and 35% for women were round 46%  
11 and 47%, respectively. If BF% were controlled under 25% for men and 35% for women, 56%-65%  
12 of clustering of  $\geq 2$  risk factors would be prevented.  
13  
14

## 15 Discussion

16  
17 The present study, using data obtained from Han and Mongolian adults from Inner Mongolia,  
18 China showed that BF% performed differently for discriminating CVD risk factors in sex and  
19 ethnicity. The optimal BF% cut-off points for men and women were approximately 24.0% and  
20 34.0% in Han adults, and 25.0% and 35.0% in Mongolian population, respectively. Compared  
21 with WHO criteria, the optimal BF% cut-offs in this study were a little lower in Han adults, but  
22 similar in Mongolian, which were taken account of validity to detect CVD risk factors and  
23 clustering two or more CVD risk factors.  
24  
25

26 BMI is the most widely used measure to diagnose obesity. However, the accuracy of BMI in  
27 detecting excess body adiposity in the general adult population is limited, because BMI cannot  
28 measure BF% directly and poorly distinguishes among total body fat, total body lean, and bone  
29 mass[12, 13]. To overcome misclassifications, direct measurements of BF% would be a better  
30 tool for diagnosing obesity. Moreover, BF% has been found to have a strong association with  
31 multiple CVD risk factors in several studies conducted in China[8], Korea[14], and other ethnic  
32 groups[15-17]. Our data also support the good discrimination of BF% for each CVD risk factor  
33 and clustering of  $\geq 2$  risk factors in both sexes and ethnicities. However, BF% seems performed  
34 better in women than in men to detect CVD risk factors, which might result from greater less  
35 mass and lower fat mass men had than women[18]. Besides, BF% had larger AUCs for almost  
36 CVD risk factors in women aged  $< 50$  years than in the older women, but not obviously in men. In  
37 a Korean study, women after menopause had not only higher total body fat percentage but also its  
38 different distribution, which independently correlates with cardiovascular disease risk factors[19].  
39 In addition, a study of 402 women aged 30-75 years in Southern India also shown that  
40 menopausal status and associated obesity created a compatible atmosphere for abnormal  
41 metabolism and aggravated cardio metabolic risk factors[20]. However, the relationship between  
42 obesity in women after menopause and CVD risk factors is more vulnerable to the effect of  
43 confounding variables, such as ageing, which might affect the accuracy of prediction of BF% for  
44 CVD risk factors.  
45  
46  
47  
48

49 It has been demonstrated that adipose tissue distribution varies among different ethnicities[21].  
50 As is well known, the increased risks of metabolic diseases associated with obesity occur at lower  
51 BMIs in Asians, and these population are predisposed to visceral or abdominal obesity. In a study  
52 of peri- and postmenopausal women in Thai, 34% was proposed as the optimal BF% cut-off  
53 points to identify women at risk of metabolic syndrome[22]. In addition, A cross-sectional study  
54 of the middle-aged Japanese men shown that the cut-off point of BF% for detecting participants  
55 with 1 or more CVD risk factors (diabetes mellitus, hypertension, dyslipidemia) was 20.3%[23].  
56 Joseph, *et al.* recommended an optimal BF% cut-off values of 25.5 in men and 38.0 in women for  
57  
58  
59

1  
2  
3 Asian Indian individuals[24]. Furthermore, Kim, *et al* reported that a BF% of 21% for men and  
4 37% for women may be the appropriate cut-off values in Korean adults[25]. These discrepancies  
5 mainly result from different ethnic groups, age and outcome. By now, BF% has not been  
6 recommended as an adiposity index in the Chinese population yet, and there has been little study  
7 on the cutoff point for BF%. Li, *et al* proposed 25% and 35% as optimal BF% cut-off points for  
8 Chinese men and women to predict metabolic syndrome and Type 2 diabetes using data from the  
9 Shanghai Diabetes Studies (SHDS), respectively[8]. In this study, the optimal cut-off values of  
10 BF% to detect diabetes, hypertension, and dyslipidemia for men and women in Han adults were  
11 found to be 24% and 34%, respectively. In Mongolian population, the optimal BF% cut-offs were  
12 25% for men and 35% for women. Mongolians have a distinctive lifestyle and dietary habits  
13 characterized by a preference for high protein and fatty foods of animal origin[26], which is  
14 different from Han population. Zhang, *et al* reported the prevalence of overweight or obesity was  
15 higher in Mongolian people than Han people using WHO criteria (26.1% vs 21.3%,  
16 respectively)[27]. Moreover, a study evaluating the relationship among ethnic groups and their  
17 CVD risk factors (hypertension, obesity, diabetes, dyslipidemia, smoking) shown that clustering  
18 of  $\geq 2$  or  $\geq 3$  of these risk factors was noted in 66.9% or 36.5% of Mongolian as well as 62.0% or  
19 28.3% of Han subjects, respectively[28]. Because of different genetic backgrounds, lifestyles and  
20 dietary patterns, the optimal BF% cut-offs of Han adults may be not the same as Mongolian.

21  
22  
23  
24  
25 There are some limitations to our study. A major limitation of the present study is cross-sectional  
26 design, which cannot be used to establish temporal relationship and causality. Lots of epidemic  
27 studies, especially prospective cohort studies, need to be completed to improve cutoff points  
28 accuracy of BF% in China. Second, BF% in this study was measured using bioelectrical  
29 impedance analysis, which tends to underestimate body fat in all subjects and in men and women  
30 separately[29]. However, considering the convenience and inexpensiveness of BIA, large-scale  
31 epidemiological investigations appropriately use this analysis. Finally, the subjects were from  
32 Inner Mongolia, so the study's findings cannot necessarily be representative of all Chinese adults,  
33 especially Han people.

34  
35  
36 The current definitions of obesity using BF% are based on Western populations and probably  
37 need to be modified for Chinese population. The present study showed the optimal BF% cut-off  
38 points for men and women were around 24.0% and 34.0% in Han adults, and 25.0% and 35.0% in  
39 Mongolian population of Inner Mongolia, China, respectively. Considering the rapid growth of  
40 obesity in China[2], these optimal body fat percentage cut-offs will contribute to public health  
41 prevention and intervention.

42  
43  
44 **Acknowledgments** This study was supported by the National Science & Technology Pillar  
45 Program during the 12<sup>th</sup> Five-year Plan Period, Grant 2012BAI37B02 from the Ministry of  
46 Science and Technology, Beijing, People's Republic of China to Guangliang Shan, which  
47 enabled the completion of the project. We sincerely express our gratitude to all the staff of Inner  
48 Mongolia Autonomous Region Center for Disease Control and Prevention for support with the  
49 collection of demographic data.

50  
51  
52 **Contributors** YL participated in the data collection and drafted the manuscript. HW, WW, HG,  
53 YQ, GX, GL participated in the data collection. KW, FD, LP, GZ, GS participated in the design  
54 of the study and undertook statistical analyses. All authors were involved in writing the paper and  
55 had final approval of the submitted and published versions.



**Funding** This study was supported by the National Science & Technology Pillar Program during the 12<sup>th</sup> Five-year Plan Period, Grant 2012BAI37B02 from the Ministry of Science and Technology, Beijing, People's Republic of China to Guangliang Shan.

**Competing interests** None declared.

**Ethics approval** The study was approved by the Institutional Review Board of the Institute of Basic Medical Sciences, Chinese Academy of Medical Sciences(NO.028-2013).

**Provenance and peer review** Not commissioned; externally peer reviewed.

**Data sharing statement** No additional data are available.

## References

1. Trends in adult body-mass index in 200 countries from 1975 to 2014: a pooled analysis of 1698 population-based measurement studies with 19.2 million participants. *Lancet* 2016;387:1377-1396.
2. Mi YJ, Zhang B, Wang HJ, Yan J, Han W, Zhao J, *et al*. Prevalence and Secular Trends in Obesity Among Chinese Adults, 1991-2011. *Am J Prev Med* 2015;49:661-669.
3. Lavie CJ, McAuley PA, Church TS, Milani RV, Blair SN. Obesity and cardiovascular diseases: implications regarding fitness, fatness, and severity in the obesity paradox. *J Am Coll Cardiol* 2014;63:1345-1354.
4. Habib SS. Body mass index and body fat percentage in assessment of obesity prevalence in saudi adults. *Biomed Environ Sci* 2013;26:94-99.
5. Meeuwse S, Horgan GW, Elia M. The relationship between BMI and percent body fat, measured by bioelectrical impedance, in a large adult sample is curvilinear and influenced by age and sex. *Clin Nutr* 2010;29:560-566.
6. Physical status: the use and interpretation of anthropometry. Report of a WHO Expert Committee. *World Health Organ Tech Rep Ser* 1995;854:1-452.
7. Deurenberg P, Deurenberg-Yap M. Validity of body composition methods across ethnic population groups. *Acta Diabetol* 2003;40 Suppl 1:S246-249.
8. Li L, Wang C, Bao Y, Peng L, Gu H, Jia W. Optimal body fat percentage cut-offs for obesity in Chinese adults. *Clin Exp Pharmacol Physiol* 2012;39:393-398.
9. Wang C, Hou XH, Zhang ML, Bao YQ, Zou YH, Zhong WH, *et al*. Comparison of body mass index with body fat percentage in the evaluation of obesity in Chinese. *Biomed Environ Sci* 2010;23:173-179.
10. Dugee O, Khor GL, Lye MS, Luvsannyam L, Janchiv O, Jamyan B, *et al*. Association of major dietary patterns with obesity risk among Mongolian men and women. *Asia Pac J Clin Nutr* 2009;18:433-440.
11. Li G, Wang H, Wang K, Wang W, Dong F, Qian Y, *et al*. Prevalence, awareness, treatment, control and risk factors related to hypertension among urban adults in Inner Mongolia 2014: differences between Mongolian and Han populations. *BMC Public Health* 2016;16:294.
12. Romero-Corral A, Somers VK, Sierra-Johnson J, Thomas RJ, Collazo-Clavell ML, Korinek J, *et al*. Accuracy of body mass index in diagnosing obesity in the adult general population. *Int J Obes (Lond)* 2008;32:959-966.
13. Goonasegaran AR, Nabila FN, Shuhada NS. Comparison of the effectiveness of body mass index and body fat percentage in defining body composition. *Singapore Med J* 2012;53:403-408.

14. Kim JY, Han SH, Yang BM. Implication of high-body-fat percentage on cardiometabolic risk in middle-aged, healthy, normal-weight adults. *Obesity (Silver Spring)* 2013;21:1571-1577.
15. Gomez-Ambrosi J, Silva C, Galofre JC, Escalada J, Santos S, Gil MJ, *et al*. Body adiposity and type 2 diabetes: increased risk with a high body fat percentage even having a normal BMI. *Obesity (Silver Spring)* 2011;19:1439-1444.
16. Lamb MM, Ogden CL, Carroll MD, Lacher DA, Flegal KM. Association of body fat percentage with lipid concentrations in children and adolescents: United States, 1999-2004. *Am J Clin Nutr* 2011;94:877-883.
17. Shea JL, King MT, Yi Y, Gulliver W, Sun G. Body fat percentage is associated with cardiometabolic dysregulation in BMI-defined normal weight subjects. *Nutr Metab Cardiovasc Dis* 2012;22:741-747.
18. Hodge S, Bunting BP, Carr E, Strain JJ, Stewart-Knox BJ. Obesity, whole blood serotonin and sex differences in healthy volunteers. *Obes Facts* 2012;5:399-407.
19. Park JK, Lim YH, Kim KS, Kim SG, Kim JH, Lim HG, *et al*. Body fat distribution after menopause and cardiovascular disease risk factors: Korean National Health and Nutrition Examination Survey 2010. *J Womens Health (Larchmt)* 2013;22:587-594.
20. Dasgupta S, Salman M, Lokesh S, Xaviour D, Saheb SY, Prasad BV, *et al*. Menopause versus aging: The predictor of obesity and metabolic aberrations among menopausal women of Karnataka, South India. *J Midlife Health* 2012;3:24-30.
21. Carroll JF, Chiapa AL, Rodriguez M, Phelps DR, Cardarelli KM, Vishwanatha JK, *et al*. Visceral fat, waist circumference, and BMI: impact of race/ethnicity. *Obesity (Silver Spring)* 2008;16:600-607.
22. Bintvihok W, Chaikittisilpa S, Panyakamlerd K, Jaisamrarn U, Taechakraichana N. Cut-off value of body fat in association with metabolic syndrome in Thai peri- and postmenopausal women. *Climacteric* 2013;16:393-397.
23. Yamashita K, Kondo T, Osugi S, Shimokata K, Maeda K, Okumura N, *et al*. The significance of measuring body fat percentage determined by bioelectrical impedance analysis for detecting subjects with cardiovascular disease risk factors. *Circ J* 2012;76:2435-2442.
24. Joseph L, Wasir JS, Misra A, Vikram NK, Goel K, Pandey RM, *et al*. Appropriate values of adiposity and lean body mass indices to detect cardiovascular risk factors in Asian Indians. *Diabetes Technol Ther* 2011;13:899-906.
25. Kim CH, Park HS, Park M, Kim H, Kim C. Optimal cutoffs of percentage body fat for predicting obesity-related cardiovascular disease risk factors in Korean adults. *Am J Clin Nutr* 2011;94:34-39.
26. Otgontuya D, Jr., Khor GL, Lye MS, Norhaizan ME. Obesity among Mongolian Adults from Urban and Rural Areas. *Malays J Nutr* 2009;15:185-194.
27. Zhang X, Sun Z, Zheng L, Liu S, Xu C, Li J, *et al*. Ethnic differences in overweight and obesity between Han and Mongolian rural Chinese. *Acta Cardiologica* 2009;64:239-245.
28. Li N, Wang H, Yan Z, Yao X, Hong J, Zhou L. Ethnic disparities in the clustering of risk factors for cardiovascular disease among the Kazakh, Uygur, Mongolian and Han populations of Xinjiang: a cross-sectional study. *BMC Public Health* 2012;12:499.
29. Sun G, French CR, Martin GR, Younghusband B, Green RC, Xie YG, *et al*. Comparison of multifrequency bioelectrical impedance analysis with dual-energy X-ray absorptiometry for assessment of percentage body fat in a large, healthy population. *Am J Clin Nutr* 2005;81:74-78.

1  
2  
3  
4  
5  
6  
7  
8  
9  
10  
11  
12  
13  
14  
15  
16  
17  
18  
19  
20  
21  
22  
23  
24  
25  
26  
27  
28  
29  
30  
31  
32  
33  
34  
35  
36  
37  
38  
39  
40  
41  
42  
43  
44  
45  
46  
47  
48  
49  
50  
51  
52  
53  
54  
55  
56  
57  
58  
59  
60

For peer review only

**Table 1.** Baseline Characteristics by sex in Han and Mongolian adults

| Variables               | Han(n=2308)     |               |                | Mongolian(n=913) |              |              |
|-------------------------|-----------------|---------------|----------------|------------------|--------------|--------------|
|                         | Men(n=898)      | Women(n=1410) | All cases      | Men(n=355)       | Women(n=558) | All cases    |
| Age(years)              | 46.20±14.05***  | 44.24±13.29   | 45.00±13.62    | 45.91±13.69**    | 43.34±13.03  | 44.34±13.34  |
| Age groups (%)          | ***             |               |                | ***              |              |              |
| 20-49                   | 58.02           | 66.52         | 63.21          | 57.75            | 68.64        | 64.4         |
| 50-80                   | 41.98           | 33.48         | 36.79          | 42.25            | 31.36        | 35.6         |
| Height(cm)              | 170.12±5.94***  | 158.28±5.51   | 162.89±8.10    | 170.54±6.35***   | 158.53±5.46  | 163.21±8.26  |
| Weight(kg)              | 72.92±12.18***  | 60.20±9.70    | 65.15±12.39### | 75.11±12.96***   | 61.54±10.08  | 66.82±13.08  |
| BMI(kg/m <sup>2</sup> ) | 25.17±3.82***   | 24.04±3.72    | 24.48±3.80###  | 25.78±3.96***    | 24.52±4.07   | 25.01±4.07   |
| BMI groups (%)          | ***             |               | ###            | ***              |              |              |
| overweight              | 40.42           | 34.04         | 36.53          | 41.41            | 37.28        | 38.88        |
| obesity                 | 21.71           | 14.04         | 17.03          | 28.45            | 17.92        | 22.02        |
| BF (%)                  | 22.54±5.77***   | 32.95±6.18    | 28.90±7.88###  | 23.86±5.72***    | 33.98±6.40   | 30.05±7.88   |
| SBP(mmHg)               | 127.40±14.96*** | 119.07±17.14  | 122.31±16.82   | 129.4±16.05***   | 118.22±17.65 | 122.57±17.89 |
| DBP(mmHg)               | 80.21±10.52***  | 75.42±10.66   | 77.28±10.86    | 82.2±11.89***    | 75.67±11.96  | 78.21±12.34  |
| FPG(mmol/L)             | 5.53±1.49***    | 5.22±1.08     | 5.34±1.27      | 5.56±1.48***     | 5.14±1.09    | 5.30±1.27    |
| TC(mmol/L)              | 4.86±1.00*      | 4.76±1.04     | 4.80±1.03###   | 5.10±0.97***     | 4.89±1.03    | 4.98±1.02    |
| TG(mmol/L)              | 2.18±1.89***    | 1.55±1.13     | 1.80±1.50##    | 2.00±1.46***     | 1.46±1.18    | 1.67±1.32    |
| LDL-C(mmol/L)           | 2.86±0.86       | 2.83±0.85     | 2.84±0.86###   | 3.13±0.87***     | 2.93±0.86    | 3.01±0.87    |
| HDL-C(mmol/L)           | 1.19±0.32***    | 1.39±0.34     | 1.31±0.34###   | 1.27±0.34***     | 1.45±0.37    | 1.38±0.37    |
| Hypertension (%)        | 33.74***        | 23.48         | 27.47#         | 40.28***         | 25.63        | 31.33        |
| Diabetes (%)            | 9.58***         | 5.53          | 7.11           | 9.86***          | 3.23         | 5.81         |
| Dyslipidemia (%)        | 51.11***        | 27.73         | 36.83          | 47.32***         | 26.34        | 34.5         |
| Risk factors ≥ 2(%)     | 24.16***        | 12.2          | 16.85          | 27.32***         | 13.8         | 19.06        |

Values are means ± SD or %.

\* $P < 0.05$ , \*\* $P < 0.01$ , \*\*\* $P < 0.001$  compared with women within Han or Mongolian adults; # $P < 0.05$ , ## $P < 0.01$ , ### $P < 0.001$  compared with Mongolian adults (Student's t-tests for continuous variables; Chi-square tests for categorical variables).

BF (%), body fat percentage; SBP, systolic blood pressure; DBP, diastolic blood pressure; FPG, fasting plasma glucose;

TC, total cholesterol; TG, triglycerides; LDL-C, low-density lipoprotein-cholesterol; HDL-C, high-density lipoprotein-cholesterol.

**Table 2.** Area under receiver operating characteristic (ROC) curves of BF% screening CVD risk factors

|                  | Hypertension         | Diabetes             | Dyslipidemia         | Risk factors $\geq$ 2 |
|------------------|----------------------|----------------------|----------------------|-----------------------|
| <b>Han</b>       |                      |                      |                      |                       |
| Men              |                      |                      |                      |                       |
| All ages         | 0.696(0.661,0.732)   | 0.589(0.531,0.648)   | 0.682(0.647,0.717)   | 0.699(0.662,0.736)    |
| 20-49 years      | 0.734(0.686,0.782)   | 0.532(0.417,0.646)   | 0.700(0.655,0.745)   | 0.731(0.681,0.780)    |
| 50-80 years      | 0.666(0.611,0.720)   | 0.606(0.536,0.676)   | 0.661(0.607,0.716)   | 0.670(0.613,0.726)    |
| Women            |                      |                      |                      |                       |
| All ages         | 0.737(0.707,0.767)   | 0.728(0.676,0.780) * | 0.711(0.683,0.740)   | 0.763(0.729,0.797) *  |
| 20-49 years      | 0.761(0.718,0.805)   | 0.787(0.700,0.874)   | 0.735(0.698,0.773)   | 0.836(0.788,0.885)    |
| 50-80 years      | 0.645(0.595,0.695) # | 0.617(0.544,0.689) # | 0.596(0.545,0.646) # | 0.644(0.590,0.698) #  |
| <b>Mongolian</b> |                      |                      |                      |                       |
| Men              |                      |                      |                      |                       |
| All ages         | 0.702(0.648,0.757)   | 0.686(0.609,0.764)   | 0.690(0.636,0.745)   | 0.736(0.683,0.789)    |
| 20-49 years      | 0.714(0.636,0.793)   | 0.765(0.646,0.884)   | 0.681(0.608,0.753)   | 0.764(0.688,0.839)    |
| 50-80 years      | 0.665(0.577,0.754)   | 0.609(0.498,0.720)   | 0.689(0.604,0.775)   | 0.689(0.606,0.772)    |
| Women            |                      |                      |                      |                       |
| All ages         | 0.733(0.685,0.780)   | 0.733(0.601,0.865)   | 0.685(0.637,0.733)   | 0.783(0.730,0.835)    |
| 20-49 years      | 0.643(0.557,0.729)   | 0.729(0.616,0.842)   | 0.670(0.604,0.735)   | 0.764(0.666,0.863)    |
| 50-80 years      | 0.683(0.604,0.763)   | 0.664(0.481,0.848)   | 0.586(0.502,0.671)   | 0.690(0.607,0.773)    |

\* $P < 0.05$ , Compared to men.# $P < 0.05$ , Compared to 20-49 years.

**Table 3.** Optimal cut-off values of BF% and their sensitivities, specificities, and Youden's index for CVD risk factors by age groups and sex

|                  | Hypertension |      |      |      | Diabetes |       |      |      | Dyslipidemia |      |      |      | Risk factors $\geq$ 2 |      |      |      |
|------------------|--------------|------|------|------|----------|-------|------|------|--------------|------|------|------|-----------------------|------|------|------|
|                  | Cutoff       | Sen  | Spe  | YI   | Cutoff   | Sen   | Spe  | YI   | Cutoff       | Sen  | Spe  | YI   | Cutoff                | Sen  | Spe  | YI   |
| <b>Han</b>       |              |      |      |      |          |       |      |      |              |      |      |      |                       |      |      |      |
| Men              |              |      |      |      |          |       |      |      |              |      |      |      |                       |      |      |      |
| All ages         | 24.2         | 62.7 | 70.3 | 33.0 | 18.7     | 94.2  | 23.5 | 17.7 | 21.6         | 77.3 | 52.4 | 29.7 | 24.2                  | 64.5 | 66.7 | 31.2 |
| 20-49 years      | 24.2         | 69.3 | 71.1 | 40.4 | 18.8     | 92.3  | 24.6 | 17.0 | 21.6         | 75.8 | 56.0 | 31.9 | 24.2                  | 68.4 | 67.8 | 36.3 |
| 50-80 years      | 24.2         | 58.0 | 68.7 | 26.6 | 22.5     | 75.0  | 45.1 | 20.1 | 20.5         | 87.1 | 41.9 | 29.0 | 25.0                  | 54.9 | 71.8 | 26.7 |
| Women            |              |      |      |      |          |       |      |      |              |      |      |      |                       |      |      |      |
| All ages         | 34.2         | 71.9 | 64.8 | 36.7 | 35.4     | 69.2  | 67.5 | 36.7 | 32.7         | 77.2 | 55.8 | 33.1 | 33.7                  | 83.1 | 58.1 | 41.2 |
| 20-49 years      | 33.6         | 73.7 | 67.2 | 40.9 | 32.0     | 94.4  | 52.6 | 47.1 | 33.9         | 66.1 | 70.3 | 36.5 | 33.9                  | 90.5 | 65.6 | 56.1 |
| 50-80 years      | 36.8         | 52.6 | 70.7 | 23.2 | 35.4     | 70.0  | 51.2 | 21.2 | 34.8         | 66.8 | 50.6 | 17.4 | 36.7                  | 56.9 | 65.5 | 22.4 |
| <b>Mongolian</b> |              |      |      |      |          |       |      |      |              |      |      |      |                       |      |      |      |
| Men              |              |      |      |      |          |       |      |      |              |      |      |      |                       |      |      |      |
| All ages         | 23.0         | 84.6 | 48.1 | 32.7 | 21.9     | 97.1  | 33.4 | 30.6 | 21.0         | 89.3 | 41.7 | 31.0 | 24.6                  | 77.3 | 60.1 | 37.4 |
| 20-49 years      | 23.0         | 87.3 | 51.3 | 38.6 | 26.8     | 75.0  | 75.1 | 50.1 | 18.5         | 94.5 | 35.1 | 29.6 | 25.7                  | 72.2 | 71.6 | 43.8 |
| 50-80 years      | 21.9         | 88.6 | 40.3 | 29.0 | 22.0     | 95.7  | 28.3 | 24.0 | 21.0         | 94.8 | 38.4 | 33.2 | 21.9                  | 96.7 | 37.1 | 33.8 |
| Women            |              |      |      |      |          |       |      |      |              |      |      |      |                       |      |      |      |
| All ages         | 35.7         | 71.3 | 66.3 | 37.6 | 40.0     | 55.6  | 84.6 | 40.2 | 36.4         | 62.6 | 68.6 | 31.2 | 36.4                  | 80.5 | 66.9 | 47.5 |
| 20-49 years      | 35.7         | 55.6 | 70.7 | 26.3 | 34.8     | 100.0 | 61.8 | 61.8 | 31.1         | 82.9 | 43.5 | 26.3 | 36.4                  | 70.0 | 74.1 | 44.1 |
| 50-80 years      | 36.7         | 73.5 | 54.5 | 28.0 | 41.0     | 60.0  | 81.3 | 41.3 | 36.5         | 77.9 | 46.9 | 24.9 | 36.6                  | 84.2 | 46.6 | 30.8 |

Sen, sensitivity; Spe, specificity; YI, Youden's index.

**Table 4.** Sensitivity, specificity and Youden's index for BF% to detect CVD risk factors by sex-specific cut-offs in Han adults

|       | Hypertension |      |      | Diabetes |      |      | Dyslipidemia |      |      | Risk factors $\geq$ 2 |      |      |
|-------|--------------|------|------|----------|------|------|--------------|------|------|-----------------------|------|------|
|       | Sen          | Spe  | YI   | Sen      | Spe  | YI   | Sen          | Spe  | YI   | Sen                   | Spe  | YI   |
| Men   |              |      |      |          |      |      |              |      |      |                       |      |      |
| 21    | 83.8         | 41.3 | 25.2 | 79.1     | 34.1 | 13.2 | 81.1         | 47.4 | 28.4 | 88.0                  | 39.5 | 27.5 |
| 22    | 77.6         | 49.4 | 27.0 | 70.9     | 41.5 | 12.4 | 73.4         | 54.7 | 28.1 | 81.1                  | 47.1 | 28.3 |
| 23    | 69.6         | 59.2 | 28.8 | 61.6     | 50.6 | 12.3 | 63.8         | 63.3 | 27.2 | 72.4                  | 56.4 | 28.7 |
| 24    | 64.0         | 67.1 | 31.1 | 53.5     | 57.6 | 11.1 | 56.0         | 69.7 | 25.7 | 66.4                  | 63.9 | 30.2 |
| 25    | 52.5         | 74.5 | 26.9 | 44.2     | 66.4 | 10.6 | 45.3         | 76.5 | 21.9 | 55.8                  | 72.1 | 27.9 |
| 26    | 43.9         | 81.3 | 25.2 | 33.7     | 73.5 | 7.2  | 51.1         | 81.3 | 32.4 | 44.7                  | 78.4 | 23.1 |
| Women |              |      |      |          |      |      |              |      |      |                       |      |      |
| 32    | 84.0         | 50.5 | 34.5 | 89.7     | 44.3 | 34.0 | 80.3         | 51.1 | 31.4 | 91.3                  | 47.1 | 38.4 |
| 33    | 78.6         | 56.9 | 35.5 | 82.1     | 50.4 | 32.4 | 74.7         | 57.5 | 32.2 | 85.5                  | 53.3 | 38.8 |
| 34    | 72.2         | 63.2 | 35.4 | 75.6     | 56.7 | 32.3 | 68.3         | 63.8 | 32.1 | 79.7                  | 59.7 | 39.3 |
| 35    | 64.4         | 70.9 | 35.3 | 70.5     | 64.6 | 35.1 | 58.6         | 70.8 | 29.3 | 69.8                  | 67.1 | 36.9 |
| 36    | 55.6         | 77.3 | 32.9 | 62.8     | 71.5 | 34.3 | 48.3         | 76.5 | 24.8 | 61.1                  | 73.8 | 34.9 |
| 37    | 47.7         | 82.7 | 30.4 | 53.9     | 77.3 | 31.1 | 38.9         | 81.1 | 19.9 | 52.3                  | 79.4 | 31.7 |

Sen, sensitivity; Spe, specificity; YI, Youden's index.

**Table 5.** Sensitivity, specificity and Youden's index for BF% to detect CVD risk factors by sex-specific cut-offs in Mongolian adults

|       | Hypertension |      |      | Diabetes |      |      | Dyslipidemia |      |      | Risk factors $\geq$ 2 |      |      |
|-------|--------------|------|------|----------|------|------|--------------|------|------|-----------------------|------|------|
|       | Sen          | Spe  | YI   | Sen      | Spe  | YI   | Sen          | Spe  | YI   | Sen                   | Spe  | YI   |
| Men   |              |      |      |          |      |      |              |      |      |                       |      |      |
| 21    | 88.1         | 37.3 | 25.4 | 97.1     | 29.7 | 26.8 | 89.3         | 41.7 | 31.0 | 95.9                  | 35.7 | 31.5 |
| 22    | 86.7         | 43.4 | 30.1 | 94.3     | 34.1 | 28.4 | 82.7         | 43.9 | 26.6 | 93.8                  | 40.7 | 34.5 |
| 23    | 84.6         | 48.1 | 32.7 | 88.6     | 37.5 | 26.1 | 81.0         | 49.2 | 30.2 | 91.8                  | 45.0 | 36.7 |
| 24    | 72.7         | 54.7 | 27.5 | 82.9     | 46.6 | 29.4 | 69.1         | 55.1 | 24.1 | 79.4                  | 52.3 | 31.7 |
| 25    | 60.8         | 64.2 | 25.0 | 71.4     | 56.9 | 28.3 | 60.1         | 66.8 | 27.0 | 70.1                  | 63.2 | 33.3 |
| 26    | 53.2         | 72.2 | 25.3 | 60.0     | 64.4 | 24.4 | 49.4         | 72.2 | 21.6 | 60.8                  | 70.5 | 31.4 |
| Women |              |      |      |          |      |      |              |      |      |                       |      |      |
| 32    | 84.6         | 42.9 | 27.5 | 83.3     | 36.5 | 19.8 | 81.6         | 42.1 | 23.7 | 92.2                  | 40.3 | 32.5 |
| 33    | 79.7         | 48.9 | 28.6 | 83.3     | 42.4 | 25.7 | 76.9         | 48.2 | 25.1 | 88.3                  | 46.4 | 34.7 |
| 34    | 75.5         | 54.7 | 30.2 | 83.3     | 48.0 | 31.3 | 73.5         | 54.3 | 27.7 | 85.7                  | 52.2 | 37.9 |
| 35    | 73.4         | 62.2 | 35.6 | 77.8     | 54.1 | 31.9 | 68.7         | 60.8 | 29.5 | 84.4                  | 59.0 | 43.5 |
| 36    | 68.5         | 67.0 | 35.5 | 66.7     | 58.7 | 25.4 | 63.3         | 65.5 | 28.7 | 80.5                  | 64.0 | 44.6 |
| 37    | 58.7         | 73.5 | 32.2 | 61.1     | 66.1 | 27.2 | 55.1         | 72.5 | 27.6 | 70.1                  | 70.9 | 41.0 |

Sen, sensitivity; Spe, specificity; YI, Youden's index.

**Table 6.** Age-adjusted OR(95%CI) and PARP of each CVD risk factor by sex-specific cut-offs for BF% in Han and Mongolian adults

|                       | <i>OR*</i> | <i>95%CI</i> | <i>PARP(%)</i> |
|-----------------------|------------|--------------|----------------|
| <b>Han</b>            |            |              |                |
| Men(BF% $\geq$ 24%)   |            |              |                |
| Hypertension          | 3.680      | 2.728-4.964  | 53.8           |
| Diabetes              | 1.479      | 0.940-2.328  | 17.2           |
| Dyslipidemia          | 2.966      | 2.251-3.908  | 46.1           |
| Risk factors $\geq$ 2 | 3.450      | 2.490-4.780  | 51.6           |
| Women(BF% $\geq$ 34%) |            |              |                |
| Hypertension          | 3.382      | 2.544-4.494  | 51.8           |
| Diabetes              | 2.660      | 1.539-4.596  | 42.8           |
| Dyslipidemia          | 3.152      | 2.439-4.072  | 49.3           |
| Risk factors $\geq$ 2 | 4.016      | 2.682-6.014  | 57.6           |
| <b>Mongolian</b>      |            |              |                |
| Men(BF% $\geq$ 25%)   |            |              |                |
| Hypertension          | 2.587      | 1.635-4.094  | 42.2           |
| Diabetes              | 2.982      | 1.374-6.471  | 47.6           |
| Dyslipidemia          | 2.986      | 1.930-4.620  | 47.7           |
| Risk factors $\geq$ 2 | 3.772      | 2.251-6.321  | 56.0           |
| Women(BF% $\geq$ 35%) |            |              |                |
| Hypertension          | 2.851      | 1.796-4.526  | 46.5           |
| Diabetes              | 2.061      | 0.634-6.697  | 33.3           |
| Dyslipidemia          | 2.599      | 1.704-3.964  | 42.9           |
| Risk factors $\geq$ 2 | 4.882      | 2.497-9.545  | 64.6           |

\*Adjusted odds ratios for cardiovascular risk factors in subjects using sex-specific cut-offs for BF%, adjusted for age.

OR, odds ratios; PARP, population attributable risk proportion.

**Figure 1.** ROC curves for BF% screening CVD risk factors in men and women among Han and Mongolian adults.



1  
2  
3  
4  
5  
6  
7  
8  
9  
10  
11  
12  
13  
14  
15  
16  
17  
18  
19  
20  
21  
22  
23  
24  
25  
26  
27  
28  
29  
30  
31  
32  
33  
34  
35  
36  
37  
38  
39  
40  
41  
42  
43  
44  
45  
46  
47  
48  
49  
50  
51  
52  
53  
54  
55  
56  
57  
58  
59  
60



Figure 1 ROC curves for BF% screening CVD risk factors.  
Optimal body fat percentage cu  
283x267mm (300 x 300 DPI)

only

## STROBE Statement—checklist of items that should be included in reports of observational studies

|                          | Item No | Recommendation                                                                                                                                                                                                                                                                                                                                                                                                                                                         | Page No |
|--------------------------|---------|------------------------------------------------------------------------------------------------------------------------------------------------------------------------------------------------------------------------------------------------------------------------------------------------------------------------------------------------------------------------------------------------------------------------------------------------------------------------|---------|
| Title and abstract       | 1       | (a) Indicate the study's design with a commonly used term in the title or the abstract                                                                                                                                                                                                                                                                                                                                                                                 | 1-2     |
|                          |         | (b) Provide in the abstract an informative and balanced summary of what was done and what was found                                                                                                                                                                                                                                                                                                                                                                    | 2       |
| <b>Introduction</b>      |         |                                                                                                                                                                                                                                                                                                                                                                                                                                                                        |         |
| Background/rationale     | 2       | Explain the scientific background and rationale for the investigation being reported                                                                                                                                                                                                                                                                                                                                                                                   | 3       |
| Objectives               | 3       | State specific objectives, including any prespecified hypotheses                                                                                                                                                                                                                                                                                                                                                                                                       | 3       |
| <b>Methods</b>           |         |                                                                                                                                                                                                                                                                                                                                                                                                                                                                        |         |
| Study design             | 4       | Present key elements of study design early in the paper                                                                                                                                                                                                                                                                                                                                                                                                                | 3-4     |
| Setting                  | 5       | Describe the setting, locations, and relevant dates, including periods of recruitment, exposure, follow-up, and data collection                                                                                                                                                                                                                                                                                                                                        | 3-4     |
| Participants             | 6       | (a) <i>Cohort study</i> —Give the eligibility criteria, and the sources and methods of selection of participants. Describe methods of follow-up<br><i>Case-control study</i> —Give the eligibility criteria, and the sources and methods of case ascertainment and control selection. Give the rationale for the choice of cases and controls<br><i>Cross-sectional study</i> —Give the eligibility criteria, and the sources and methods of selection of participants | 3-4     |
|                          |         | (b) <i>Cohort study</i> —For matched studies, give matching criteria and number of exposed and unexposed<br><i>Case-control study</i> —For matched studies, give matching criteria and the number of controls per case                                                                                                                                                                                                                                                 |         |
| Variables                | 7       | Clearly define all outcomes, exposures, predictors, potential confounders, and effect modifiers. Give diagnostic criteria, if applicable                                                                                                                                                                                                                                                                                                                               | 4       |
| Data sources/measurement | 8*      | For each variable of interest, give sources of data and details of methods of assessment (measurement). Describe comparability of assessment methods if there is more than one group                                                                                                                                                                                                                                                                                   | 4       |
| Bias                     | 9       | Describe any efforts to address potential sources of bias                                                                                                                                                                                                                                                                                                                                                                                                              | 4       |
| Study size               | 10      | Explain how the study size was arrived at                                                                                                                                                                                                                                                                                                                                                                                                                              | 4       |
| Quantitative variables   | 11      | Explain how quantitative variables were handled in the analyses. If applicable, describe which groupings were chosen and why                                                                                                                                                                                                                                                                                                                                           | 4       |
| Statistical methods      | 12      | (a) Describe all statistical methods, including those used to control for confounding                                                                                                                                                                                                                                                                                                                                                                                  | 4-5     |
|                          |         | (b) Describe any methods used to examine subgroups and interactions                                                                                                                                                                                                                                                                                                                                                                                                    | 4-5     |
|                          |         | (c) Explain how missing data were addressed                                                                                                                                                                                                                                                                                                                                                                                                                            |         |
|                          |         | (d) <i>Cohort study</i> —If applicable, explain how loss to follow-up was addressed<br><i>Case-control study</i> —If applicable, explain how matching of cases and controls was addressed<br><i>Cross-sectional study</i> —If applicable, describe analytical methods taking account of sampling strategy                                                                                                                                                              |         |
|                          |         | (e) Describe any sensitivity analyses                                                                                                                                                                                                                                                                                                                                                                                                                                  |         |

| Results                  |     |                                                                                                                                                                                                              | Page No |
|--------------------------|-----|--------------------------------------------------------------------------------------------------------------------------------------------------------------------------------------------------------------|---------|
| Participants             | 13* | (a) Report numbers of individuals at each stage of study—eg numbers potentially eligible, examined for eligibility, confirmed eligible, included in the study, completing follow-up, and analysed            | 3,5     |
|                          |     | (b) Give reasons for non-participation at each stage                                                                                                                                                         | 3,5     |
|                          |     | (c) Consider use of a flow diagram                                                                                                                                                                           |         |
| Descriptive data         | 14* | (a) Give characteristics of study participants (eg demographic, clinical, social) and information on exposures and potential confounders                                                                     | 5       |
|                          |     | (b) Indicate number of participants with missing data for each variable of interest                                                                                                                          |         |
|                          |     | (c) <i>Cohort study</i> —Summarise follow-up time (eg, average and total amount)                                                                                                                             |         |
| Outcome data             | 15* | <i>Cohort study</i> —Report numbers of outcome events or summary measures over time                                                                                                                          |         |
|                          |     | <i>Case-control study</i> —Report numbers in each exposure category, or summary measures of exposure                                                                                                         |         |
|                          |     | <i>Cross-sectional study</i> —Report numbers of outcome events or summary measures                                                                                                                           | 5-10    |
| Main results             | 16  | (a) Give unadjusted estimates and, if applicable, confounder-adjusted estimates and their precision (eg, 95% confidence interval). Make clear which confounders were adjusted for and why they were included | 10-11   |
|                          |     | (b) Report category boundaries when continuous variables were categorized                                                                                                                                    |         |
|                          |     | (c) If relevant, consider translating estimates of relative risk into absolute risk for a meaningful time period                                                                                             |         |
| Other analyses           | 17  | Report other analyses done—eg analyses of subgroups and interactions, and sensitivity analyses                                                                                                               |         |
| <b>Discussion</b>        |     |                                                                                                                                                                                                              |         |
| Key results              | 18  | Summarise key results with reference to study objectives                                                                                                                                                     | 11      |
| Limitations              | 19  | Discuss limitations of the study, taking into account sources of potential bias or imprecision. Discuss both direction and magnitude of any potential bias                                                   | 2       |
| Interpretation           | 20  | Give a cautious overall interpretation of results considering objectives, limitations, multiplicity of analyses, results from similar studies, and other relevant evidence                                   | 11-12   |
| Generalisability         | 21  | Discuss the generalisability (external validity) of the study results                                                                                                                                        | 12      |
| <b>Other information</b> |     |                                                                                                                                                                                                              |         |
| Funding                  | 22  | Give the source of funding and the role of the funders for the present study and, if applicable, for the original study on which the present article is based                                                | 13      |

\*Give information separately for cases and controls in case-control studies and, if applicable, for exposed and unexposed groups in cohort and cross-sectional studies.

**Note:** An Explanation and Elaboration article discusses each checklist item and gives methodological background and published examples of transparent reporting. The STROBE checklist is best used in conjunction with this article (freely available on the Web sites of PLoS Medicine at <http://www.plosmedicine.org/>, Annals of Internal Medicine at <http://www.annals.org/>, and Epidemiology at <http://www.epidem.com/>). Information on the STROBE Initiative is available at [www.strobe-statement.org](http://www.strobe-statement.org).
